# Supplementary material for: Outcomes of the EMDataResource Cryo-EM Ligand Modeling Challenge
Source: Research Square preprint supplement (doi:10.21203/rs.3.rs-3864137/v1), 2024-01-25
Supplement: Supplementary file 1 [file 4eafdb77f61456247d3f3726.xlsx]

## Sheet: short answers
2021 Ligand Challenge Submission Form
Submission Details													Ligand initial source				Ligand restraints software						Modelling software (indicate all used)
Serial	Ligand Challenge id	Target ID	Group ID	Model Team Lead	Submission Title	Challenge Target	Polymer Modelling Category	Polymer model resources	Ligand Modelling Category	Effort type	Estimated human effort	Estimated computing time	PDB Chemical Component Dictionary (CCD)	Crystallography Online Database (COD)	coordinates from PDB entry	Other	BUSTER/Grade	phenix elbow	phenix reel	ccp4 acedrg	other	ligand restraints other (manually curated from long description)	AMBER	ARP/wARP	Buccaneer	CCP-EM	Chimera	ChimeraX	COOT	CDMD	DeepTracer	direX	EMDA	EMfit	flex-EM	GemSpot	gorgon	hermitefit	iMDFF	ISOLDE	LAFTER	mainmast	MDFF	MELD	modeller	MOE	pathwalker	phenix	ProSMART
3	T0201EM014_1	T0201	EM014	Wei-Chun Kao	beta-galactosidase with PTQ remodelled in two alternate conformations	beta-galactosidase 1.9 Å (EMD-7770)	optimized	6cvm	independently refit	manual	4	4	X				X											X	X											X
4	T0203EM014_1	T0203	EM014	Wei-Chun Kao	SARS-Cov-2 ORF3a with PEE non-truncated	SARS-Cov-2 ORF3a ion channel 2.1 Å (EMD-22898)	optimized	7kjr	independently refit	manual	4	4	X					X										X	X											X
5	T0201EM004_1	T0201	EM004	Jianlin Cheng	7770 Final Model	beta-galactosidase 1.9 Å (EMD-7770)	ab initio+optimized		independently refit	partially automated, some manual steps	15	1			X						X	PyRosetta					X
6	T0203EM004_1	T0203	EM004	Jianlin Cheng	22898 Final Model	SARS-Cov-2 ORF3a ion channel 2.1 Å (EMD-22898)	ab initio+optimized		independently refit	partially automated, some manual steps	15	1			X						X	PyRosetta					X
7	T0201EM004_2	T0201	EM004	Jianlin Cheng	7770 Refined Model	beta-galactosidase 1.9 Å (EMD-7770)	ab initio+optimized		independently refit	partially automated, some manual steps	15	1			X						X	PyRosetta					X
8	T0203EM004_2	T0203	EM004	Jianlin Cheng	22898 Refined Model	SARS-Cov-2 ORF3a ion channel 2.1 Å (EMD-22898)	ab initio+optimized		independently refit	partially automated, some manual steps	15	1			X						X	PyRosetta					X
9	T0202EM004_1	T0202	EM004	Jianlin Cheng	30210 Final Model	SARS-CoV-2 RNA polymerase 2.5 Å (EMD-30210)	ab initio+optimized		independently refit	partially automated, some manual steps	15	1			X						X	PyRosetta					X
10	T0202EM004_2	T0202	EM004	Jianlin Cheng	30210 Refine Model	SARS-CoV-2 RNA polymerase 2.5 Å (EMD-30210)	ab initio+optimized		independently refit	partially automated, some manual steps	15	1			X						X	PyRosetta					X
11	T0203EM007_1	T0203	EM007	Alberto Perez	7kjr refined	SARS-Cov-2 ORF3a ion channel 2.1 Å (EMD-22898)	optimized	7kjr	optimized	partially automated, some manual steps	2	20			X						X	PyRosetta
12	T0201EM006_1	T0201	EM006	Matt Baker	Bgal PW+LF	beta-galactosidase 1.9 Å (EMD-7770)	ab initio+optimized		independently refit	partially automated, some manual steps	1	2	X					X																													X
13	T0203EM006_1	T0203	EM006	Matt Baker	SARS ORF3a PW+LF	SARS-Cov-2 ORF3a ion channel 2.1 Å (EMD-22898)	ab initio+optimized		independently refit	partially automated, some manual steps	1	1	X					X																													X
14	T0202EM006_1	T0202	EM006	Matt Baker	SARS RNAP PW+LF	SARS-CoV-2 RNA polymerase 2.5 Å (EMD-30210)	ab initio+optimized		independently refit	partially automated, some manual steps	1	1			X			X																													X
15	T0203EM001_1	T0203	EM001	Daisuke Kihara	kiharalab abinitio model EMD-22898	SARS-Cov-2 ORF3a ion channel 2.1 Å (EMD-22898)	ab initio+optimized		independently refit	partially automated, some manual steps	2	6			X						X	MD Force Field					X															X	X
16	T0202EM007_1	T0202	EM007	Alberto Perez	7bv2-refined-Perez	SARS-CoV-2 RNA polymerase 2.5 Å (EMD-30210)	optimized	7bv2	optimized	manual	36	48			X						X	Antechamber
17	T0203EM003_1	T0203	EM003	Andrew Muenks	SARS-CoV-2 ion channel density found waters	SARS-Cov-2 ORF3a ion channel 2.1 Å (EMD-22898)	optimized	7kjr	independently refit	partially automated, some manual steps	4	4			X						X	OpenBabel					X
18	T0201EM007_1	T0201	EM007	Alberto Perez	E. coli β-Galactosidase optimized by Amber	beta-galactosidase 1.9 Å (EMD-7770)	optimized	6cvm	optimized	partially automated, some manual steps	2	20			X						X	MD Force Field	X
19	T0203EM001_2	T0203	EM001	Daisuke Kihara	Kiharalab optimized model EMD-22898	SARS-Cov-2 ORF3a ion channel 2.1 Å (EMD-22898)	optimized	7kjr	optimized	partially automated, some manual steps	2	6			X						X	MD Force Field					X																X
20	T0203EM001_3	T0203	EM001	Daisuke Kihara	Kiharalab optimized model + re-dock EMD-22898	SARS-Cov-2 ORF3a ion channel 2.1 Å (EMD-22898)	optimized	7kjr	independently refit	partially automated, some manual steps	2	6				X					X	MD Force Field					X																X
21	T0201EM001_1	T0201	EM001	Daisuke Kihara	kiharalab abinitio model EMD-7770	beta-galactosidase 1.9 Å (EMD-7770)	ab initio+optimized		independently refit	partially automated, some manual steps	2	10				X					X	MD Force Field					X															X	X
22	T0201EM001_2	T0201	EM001	Daisuke Kihara	Kiharalab optimized model EMD-7770	beta-galactosidase 1.9 Å (EMD-7770)	optimized	6vcm	optimized	partially automated, some manual steps	2	6			X						X	MD Force Field					X																X
23	T0201EM001_3	T0201	EM001	Daisuke Kihara	Kiharalab optimized model + re-dock EMD-7770	beta-galactosidase 1.9 Å (EMD-7770)	optimized	6cvm	independently refit	partially automated, some manual steps	2	6				X					X	MD Force Field					X																X
24	T0202EM001_1	T0202	EM001	Daisuke Kihara	Kiharalab optimized model with covalently linked remdesivir with RNA EMD-30210	SARS-CoV-2 RNA polymerase 2.5 Å (EMD-30210)	optimized	7bv2	optimized	partially automated, some manual steps	2	6			X						X	MD Force Field					X																X
25	T0202EM001_2	T0202	EM001	Daisuke Kihara	Kiharalab optimized model EMD-30210	SARS-CoV-2 RNA polymerase 2.5 Å (EMD-30210)	optimized	7bv2	optimized	partially automated, some manual steps	2	6			X						X	MD Force Field					X																X
26	T0201EM005_1	T0201	EM005	Greg Pintilie	BetaGal-PTQ2-SWIM	beta-galactosidase 1.9 Å (EMD-7770)	not optimized		independently refit	partially automated, some manual steps	1	1				X		X									X
27	T0201EM005_2	T0201	EM005	Greg Pintilie	BetaGal-PTQ3-SWIM	beta-galactosidase 1.9 Å (EMD-7770)	not optimized		independently refit	partially automated, some manual steps	1	1				X		X									X
28	T0201EM013_1	T0201	EM013	Abishek Singharoy	Flexible fitting of ligand 2-phenylethyl 1-thio-beta-D-galactopyranoside (PTQ) and re-fitting of water hydration shell	beta-galactosidase 1.9 Å (EMD-7770)	optimized	6CVM	optimized	partially automated, some manual steps	1	3024			X						X	CGENFF																					X
30	T0203EM016_1	T0203	EM016	Dilip Kumar	LC2021_DK	SARS-Cov-2 ORF3a ion channel 2.1 Å (EMD-22898)	optimized	7KJR	independently refit	partially automated, some manual steps	8	4			X			X											X																			X
31	T0203EM017_1	T0203	EM017	Simone Weyand	Potential Repurposed Ligands for SARS-CoV2 ORF3a	SARS-Cov-2 ORF3a ion channel 2.1 Å (EMD-22898)	optimized	7KJR	independently refit	fully automated	10	3				X					X	Schrodinger LigPrep
32	T0202EM013_1	T0202	EM013	Abishek Singharoy	Docking and flexible fitting of remdesivir (F86) ligand in SARS-CoV-2 RNA polymerase using classical and QM/MM-MDFF	SARS-CoV-2 RNA polymerase 2.5 Å (EMD-30210)	optimized	7BV2	independently refit	partially automated, some manual steps	2	1000				X					X	Multiple																					X
33	T0201EM010_1	T0201	EM010	Grzegorz Chojnowski	E. coli β-Galactosidase model build de novo with ARP/wARP	beta-galactosidase 1.9 Å (EMD-7770)	ab initio+optimized		independently refit	partially automated, some manual steps	2	8				X					X	COOT MON_LIB		X				X	X											X								X
34	T0202EM010_1	T0202	EM010	Grzegorz Chojnowski	SARS-CoV-2 RNA polymerase model build de novo with ARP/wARP and Brickworx	SARS-CoV-2 RNA polymerase 2.5 Å (EMD-30210)	ab initio+optimized		independently refit	partially automated, some manual steps	2	4				X					X	COOT MON_LIB		X					X																			X
35	T0203EM010_1	T0203	EM010	Grzegorz Chojnowski	SARS-Cov-2 ORF3a ion channel model build de novo with ARP/wARP	SARS-Cov-2 ORF3a ion channel 2.1 Å (EMD-22898)	ab initio+optimized		independently refit	partially automated, some manual steps	2	2				X					X	COOT MON_LIB		X				X	X											X								X
36	T0203EM011_1	T0203	EM011	Maxim Igaev	CDMD SARS-CoV-2 ORF3a putative ion channel (with waters)	SARS-Cov-2 ORF3a ion channel 2.1 Å (EMD-22898)	ab initio+optimized		optimized	partially automated, some manual steps	3	48			X						X	MD Force Field					X																		X
37	T0202EM011_1	T0202	EM011	Maxim Igaev	CDMD SARS-CoV-2 RNA polymerase (with waters)	SARS-CoV-2 RNA polymerase 2.5 Å (EMD-30210)	ab initio+optimized		optimized	partially automated, some manual steps	3	72			X						X	MD Force Field					X																		X
38	T0201EM011_1	T0201	EM011	Maxim Igaev	CDMD beta-galactosidase (with waters/ions)	beta-galactosidase 1.9 Å (EMD-7770)	ab initio+optimized		optimized	partially automated, some manual steps	3	96			X						X	MD Force Field					X																		X
39	T0202EM012_1	T0202	EM012	Colin Palmer	CCP-EM RNAP	SARS-CoV-2 RNA polymerase 2.5 Å (EMD-30210)	optimized	7bv2, 7b3d, 6x71, 3ovb	optimized	partially automated, some manual steps	6	1	X							X						X			X				X																X
40	T0202EM005_1	T0202	EM005	Greg Pintilie	7bv2_0_F86_POP_SWIM	SARS-CoV-2 RNA polymerase 2.5 Å (EMD-30210)	not optimized		independently refit	partially automated, some manual steps	1	1				X		X									X
41	T0201EM015_1	T0201	EM015	Gunnar Schroeder	Cross-validated MD Refinement	beta-galactosidase 1.9 Å (EMD-7770)	optimized	6cvm	independently refit	partially automated, some manual steps	30	120			X						X	MD Force Field								X
42	T0203EM012_1	T0203	EM012	Colin Palmer	CCP-EM ORF3a	SARS-Cov-2 ORF3a ion channel 2.1 Å (EMD-22898)	optimized	7kjr	independently refit	partially automated, some manual steps	4	1	X							X						X			X				X								X								X
43	T0203EM009_1	T0203	EM009	Nigel Moriarty	7kjr Phenix	SARS-Cov-2 ORF3a ion channel 2.1 Å (EMD-22898)	optimized	7kjr	independently refit	partially automated, some manual steps	10	2	X					X									X	X	X																			X
44	T0201EM012_1	T0201	EM012	Colin Palmer	CCP-EM beta-gal	beta-galactosidase 1.9 Å (EMD-7770)	optimized	1jz7, 6cvm, 6tte	independently refit	partially automated, some manual steps	12	5	X							X						X			X				X								X								X
46	T0203EM005_1	T0203	EM005	Greg Pintilie	CoV2-ORF3a-PEE-SWIM	SARS-Cov-2 ORF3a ion channel 2.1 Å (EMD-22898)	not optimized		independently refit	partially automated, some manual steps	1	1				X		X									X
47	T0202EM009_1	T0202	EM009	Nigel Moriarty	7bv2 Phenix	SARS-CoV-2 RNA polymerase 2.5 Å (EMD-30210)	optimized	7bv2	independently refit	partially automated, some manual steps	10	2	X					X									X	X	X																			X
49	T0201EM009_1	T0201	EM009	Nigel Moriarty	6cvm Phenix	beta-galactosidase 1.9 Å (EMD-7770)	optimized	6cvm	independently refit	partially automated, some manual steps	10	2	X					X									X	X	X																			X
50	T0201EM002_1	T0201	EM002	Dong Si	7770_DT_real_sapce_refined	beta-galactosidase 1.9 Å (EMD-7770)	ab initio+optimized		independently refit	fully automated	0	8			X			X													X
51	T0202EM008_1	T0202	EM008	Paul Emsley	Coot&Refmac	SARS-CoV-2 RNA polymerase 2.5 Å (EMD-30210)	optimized	7bv2	independently refit	partially automated, some manual steps	0	0		X						X									X
52	T0203EM002_1	T0203	EM002	Dong Si	22898_DT_real_sapce_refined	SARS-Cov-2 ORF3a ion channel 2.1 Å (EMD-22898)	ab initio+optimized		independently refit	fully automated	0	3			X			X													X
53	T0202EM002_1	T0202	EM002	Dong Si	30210_DT_real_sapce_refined	SARS-CoV-2 RNA polymerase 2.5 Å (EMD-30210)	ab initio+optimized		independently refit	fully automated	0	1			X			X													X
54	T0203EM008_1	T0203	EM008	Paul Emsley	Coot&Refmac	SARS-Cov-2 ORF3a ion channel 2.1 Å (EMD-22898)	optimized	7kjr	independently refit	partially automated, some manual steps	0	0		X						X									X
55	T0201EM002_2	T0201	EM002	Dong Si	7770_ref_real_sapce_refined	beta-galactosidase 1.9 Å (EMD-7770)	not optimized		independently refit	fully automated	0	8			X			X													X
56	T0203EM002_2	T0203	EM002	Dong Si	22898_ref_real_sapce_refined	SARS-Cov-2 ORF3a ion channel 2.1 Å (EMD-22898)	not optimized		independently refit	fully automated	0	3			X			X													X
57	T0202EM002_2	T0202	EM002	Dong Si	30210_ref_real_sapce_refined	SARS-CoV-2 RNA polymerase 2.5 Å (EMD-30210)	not optimized		independently refit	fully automated	0	1			X			X													X
58	T0201EM008_1	T0201	EM008	Paul Emsley	Coot&Refmac	beta-galactosidase 1.9 Å (EMD-7770)	optimized	6cvm	independently refit	partially automated, some manual steps	0	0		X						X									X
59	T0203EM003_2	T0203	EM003	Andrew Muenks	SARS-CoV-2 ion channel PEE into density and optimized waters	SARS-Cov-2 ORF3a ion channel 2.1 Å (EMD-22898)	optimized	7kjr	independently refit	partially automated, some manual steps	4	4			X			X			X	Multiple					X
60	T0202EM003_1	T0202	EM003	Andrew Muenks	SARS-CoV-2 RNAP docking known ligands and found waters	SARS-CoV-2 RNA polymerase 2.5 Å (EMD-30210)	optimized	7bv2	independently refit	partially automated, some manual steps	7	6			X			X			X	Multiple					X
61	T0202EM003_2	T0202	EM003	Andrew Muenks	SARS-CoV-2 RNAP docking known ligands and optimizing native waters	SARS-CoV-2 RNA polymerase 2.5 Å (EMD-30210)	optimized	7bv2	independently refit	partially automated, some manual steps	7	6			X			X			X	Multiple					X
62	T0201EM003_1	T0201	EM003	Andrew Muenks	beta-gal docking from density finder and finding waters	beta-galactosidase 1.9 Å (EMD-7770)	optimized	6cvm	independently refit	partially automated, some manual steps	6	4			X			X			X	Multiple					X
63	T0201EM002_3	T0201	EM002	Dong Si	7770_DT	beta-galactosidase 1.9 Å (EMD-7770)	ab initio+optimized		independently refit	fully automated	0	6			X			X													X
64	T0201EM003_2	T0201	EM003	Andrew Muenks	beta-gal docking from density finder and optimizing native waters	beta-galactosidase 1.9 Å (EMD-7770)	optimized	6cvm	independently refit	partially automated, some manual steps	6	4			X			X			X	Multiple					X
65	T0201EM003_3	T0201	EM003	Andrew Muenks	beta-gal alternate PTQ docking from density finder and optimizing native waters	beta-galactosidase 1.9 Å (EMD-7770)	optimized	6cvm	independently refit	partially automated, some manual steps	6	4			X			X			X	Multiple					X
66	T0203EM002_3	T0203	EM002	Dong Si	22898_DT	SARS-Cov-2 ORF3a ion channel 2.1 Å (EMD-22898)	ab initio+optimized		independently refit	fully automated	0	2			X			X													X
[truncated: 31 more columns]

## Sheet: long answers
2021 Ligand Challenge Submission Form
Submission Details
Serial	Ligand Challenge id	Target ID	Group ID	Model Team Lead	Map preparation details (if modified)	Ligand restraints description	Modelling details	Validation details	Additional Details
3	T0201EM014_1	T0201	EM014	Wei-Chun Kao		The ligand restraints as well as its coordinates were calculated by the Grade Web Server http://grade.globalphasing.org using the PDB three-letter code "PTQ" as input. The default options were used.	The coordinates as well as the target map were downloaded from RCSB pdb entry 6cvm. The restraints of the ligand in question, PTQ, were calculated using the Grade Web Server http://grade.globalphasing.org with the three-letter pdb code PTQ as input. The restraints were calculated with default settings. All atoms of an asymmetric unit (ChainA) of 6cvm were extracted from the pdb file and were load…	Geometry validations were performed using the built-in MolProbity of phenix 1.19.1 after each round of phenix.real_space_refine .	Regarding to occupancy refinement: although I modelled two alternate conformations of PTQ in Coot, phenix.real_space_refine did not support occupancy refinement thus the occupancies of both conformers of PTQ were set to the presumed value of 0.5 throughout the process.
4	T0203EM014_1	T0203	EM014	Wei-Chun Kao		The restraints of the ligand in question, PEE, were calculated using phenix.elbow (1.19.1) with the SMILES string of PEE as input. The SMILES string of PEE was obtained from the RCSB pdb ligand page of PEE and the restraints were calculated with default settings and was optimised using the built-in amber option.	The coordinates as well as the target map were downloaded from RCSB pdb entry 7kjr. The restraints of the ligand in question, PEE, were calculated using phenix.elbow (1.19.1) with the SMILES string of PEE as input. The SMILES string of PEE was obtained from the RCSB pdb ligand page of PEE. The restraints were calculated with default settings and were optimised using the built-in amber option. All…	Validation details: Geometry validations were performed using the built-in MolProbity of phenix 1.19.1 after each round of phenix.real_space_refine .
5	T0201EM004_1	T0201	EM004	Jianlin Cheng		Ligands restraints are identified using the PyRosetta tool and added to the structure	Step 1: Backbone prediction of the EM map using DeepTracer (a deep learning method for 3D protein structure prediction), output = "backbone_structure.pdb" Step 2: Superimposed the "backbone_structure.pdb" to reference structure (Fitted PDB map) using Chimera. (Chimera version = candidate version 1.15 (build 42258) 2020-12-18, ran command = "mm #0 #1 show true" to superimpose (0 = reference struct…	Superimposed final structure to reference structure to verify the chains, ligands, residues are same as the reference structure
6	T0203EM004_1	T0203	EM004	Jianlin Cheng		Ligands restraints are identified using the PyRosetta tool and added to the structure	Step 1: Backbone prediction of the EM map using DeepTracer (a deep learning method for 3D protein structure prediction), output = "backbone_structure.pdb" Step 2: Superimposed the "backbone_structure.pdb" to reference structure (Fitted PDB map) using Chimera. (Chimera version = candidate version 1.15 (build 42258) 2020-12-18, ran command = "mm #0 #1 show true" to superimpose (0 = reference struct…	Superimposed final structure to reference structure to verify the chains, ligands, residues are same as the reference structure
7	T0201EM004_2	T0201	EM004	Jianlin Cheng		Ligands restraints are identified using the PyRosetta tool and added to the structure.	Step 1: Backbone prediction of the EM map using DeepTracer (a deep learning method for 3D protein structure prediction), output = "backbone_structure.pdb" Step 2: Superimposed the "backbone_structure.pdb" to reference structure (Fitted PDB map) using Chimera. (Chimera version = candidate version 1.15 (build 42258) 2020-12-18, ran command = "mm #0 #1 show true" to superimpose (0 = reference struct…	Superimposed final structure to reference structure to verify the chains, ligands, residues are same as the reference structure
8	T0203EM004_2	T0203	EM004	Jianlin Cheng		Ligands restraints are identified using the PyRosetta tool and added to the structure	Step 1: Backbone prediction of the EM map using DeepTracer (a deep learning method for 3D protein structure prediction), output = "backbone_structure.pdb" Step 2: Superimposed the "backbone_structure.pdb" to reference structure (Fitted PDB map) using Chimera. (Chimera version = candidate version 1.15 (build 42258) 2020-12-18, ran command = "mm #0 #1 show true" to superimpose (0 = reference struct…	Superimposed final structure to reference structure to verify the chains, ligands, residues are same as the reference structure
9	T0202EM004_1	T0202	EM004	Jianlin Cheng		Ligands restraints are identified using the PyRosetta tool and added to the structure	Step 1: Backbone prediction of the EM map using DeepTracer (a deep learning method for 3D protein structure prediction), output = "backbone_structure.pdb" Step 2: Superimposed the "backbone_structure.pdb" to reference structure (Fitted PDB map) using Chimera. (Chimera version = candidate version 1.15 (build 42258) 2020-12-18, ran command = "mm #0 #1 show true" to superimpose (0 = reference struct…	Superimposed final structure to reference structure to verify the chains, ligands, residues are same as the reference structure
10	T0202EM004_2	T0202	EM004	Jianlin Cheng		Ligands restraints are identified using the PyRosetta tool and added to the structure	Step 1: Backbone prediction of the EM map using DeepTracer (a deep learning method for 3D protein structure prediction), output = "backbone_structure.pdb" Step 2: Superimposed the "backbone_structure.pdb" to reference structure (Fitted PDB map) using Chimera. (Chimera version = candidate version 1.15 (build 42258) 2020-12-18, ran command = "mm #0 #1 show true" to superimpose (0 = reference struct…	Superimposed final structure to reference structure to verify the chains, ligands, residues are same as the reference structure
11	T0203EM007_1	T0203	EM007	Alberto Perez		We did not use restraints on the ligand. We used a molecular dynamics approach in which the ligand could move under the presence of the forcefield. We used flat-bottom harmonic position restrains on protein heavy atoms further than 5Å from the ligand and backbone flat-bottom harmonic position restraints for those residues 5Å or closer to the ligand	We used the AMBER20 molecular dynamics package: tleap to setup the system and force field, pmemd to simulate the system. We solvated the intial deposited structure with water and ions. We then proceeded to minimize and equilibrate the system to 300K and 1 atm by intially placing restraints on solute (and deposited waters/ions) during equilibration to allow the water to relax around the solute. We…	Comparison with VMD with respect intial structure and density map
12	T0201EM006_1	T0201	EM006	Matt Baker		Phenix eLBOW. 3 letter code, optimize using eLBOW AM1 QM method	Model segmentation of original (unsharpened) map with Segger in Chimera 1.15; manual refinement of segmentation with Volume eraser widget in Chimera. Model building with Pathwalker in phenix (developers version, Feb. 2021). Segmented map, threshold at which point connectivity can be seen and number of Calpha items given as inputs. Small chain breaks corrected in Coot. Ligand and water identificat…	Model validation with phenix.molprobity and phenix.model_map_cc
13	T0203EM006_1	T0203	EM006	Matt Baker		Phenix eLBOW. 3 letter code, optimize using eLBOW AM1 QM method	Model segmentation of original (unsharpened) map with Segger in Chimera 1.15; manual refinement of segmentation with Volume eraser widget in Chimera. Model building with Pathwalker in phenix (developers version, Feb. 2021). Segmented map, threshold at which point connectivity can be seen and number of Calpha items given as inputs. Small chain breaks corrected in Coot. Ligand and water identificat…	phenix.molprobity and phenix.model_map_cc
14	T0202EM006_1	T0202	EM006	Matt Baker		Phenix eLBOW. downloaded a remdesivir structure from PDB, optimize using eLBOW AM1 QM method	Model segmentation of original (unsharpened) map with Segger in Chimera 1.15; manual refinement of segmentation with Volume eraser widget in Chimera. Model building with Pathwalker in phenix (developers version, Feb. 2021). Segmented map, threshold at which point connectivity can be seen and number of Calpha items given as inputs. Small chain breaks corrected in Coot. Ligand and water identificat…	phenix.molprobity and phenix.model_map_cc
15	T0203EM001_1	T0203	EM001	Daisuke Kihara		After ligand density of a monomer was identified, the centroid of the density was used as the center for small molecule ligand docking. The docking pipeline consists of hydrogen bond optimization, a restrained minimization, and docking via Glide-XP through the Maestro interface. The top five poses are refined via simple MDFF using CHARMM36 force field parameters for protein, lipids, water and ion…	(1) Segmentation, and CA-tracing: We used our segmentation program MAINMASTseg. For each grid point in the map, amino acid type, secondary structures, and atom types were predicted by Emap2sec+. We performed CA-atom tracing by a new version of MAINMAST program. (2) Full-atom model construction: We performed PULCHRA version3.04 with default parameters. (3) Full-atom refinement stage1: We performed…	MolProbity score (protein) - quality of model: 7kjr (all chains) : 1.40 Our Model: 1.42 EMRinger score (protein) - quality of fit: 7kjr (all chains) : 5.29 Our Model: 4.61
16	T0202EM007_1	T0202	EM007	Alberto Perez		Antechamber	The 7bv2 coordinates provided by the challenge were used as input for Molecular Dynamics. Remdesivir and pyrophosphate were parameterized using antechamber from Amber 20. Waters from the input file were retained. The system was solvated in an octahedron box of TIP3P water with a minimum buffer zone of 12 Angstroms and a 150mM KCl concentration. Then it was minimized for 10K steps of steepest dece…	Validation was assessed by monitoring stability of the system to ensure convergence. All analyses were carried out using MDtraj and CPPTRAJ. Additionally correlation with the density map was ensured.
17	T0203EM003_1	T0203	EM003	Andrew Muenks		Here is a markdown file of our ligand prep pipeline. We will put this on our labs website in the future. Preparing a ligand for docking is an important first step that is often error prone. Below are steps that should be taken when preparing ligands starting from an SDF file, the filetype used by the PDB to represent ligands. **Step 0.** If you are starting with a pdb or mol2 file, your file can …	Here are our general steps. Details of scripts and xml files used to perform modeling can be made available The starting structure for each case was generated in Chimera by deleting all ligands and the resulting model was saved to {pdb name}_no_ligs.pdb. 1. Cleaned the PDB file by using the command: grep -E '^ATOM' {pdb name}_no_scs.pdb > holo.pdb 2. Unassigned blobs of density were detected by r…	We used phenix.molprobity to validate side chain conformations
18	T0201EM007_1	T0201	EM007	Alberto Perez		We did not use restraints on the ligand. We used a molecular dynamics approach in which the ligand could move under the presence of the forcefield. We used flat-bottom harmonic position restrains on protein heavy atom, water molecules, ions and ligands. In equilibrium part we released restarints on ligands ions and water molecules.	We used the AMBER20 molecular dynamics package: tleap to setup the system and force field, pmemd to simulate the system. We solvated the intial deposited structure with water and ions. We then proceeded to minimize and equilibrate the system to 300K and 1 atm by intially placing restraints on the protein, ligands and ions and water molecules from the original downloaded file and during equilibrat…	Comparison with VMD with respect intial structure and density map
19	T0203EM001_2	T0203	EM001	Daisuke Kihara		After ligand density of a monomer was identified, the centroid of the density was used as the center for small molecule ligand docking. The docking pipeline consists of hydrogen bond optimization, a restrained minimization, and docking via Glide-XP through the Maestro interface. The top five poses are refined via simple MDFF using CHARMM36 force field parameters for protein, lipids, water and ion…	The initial model (PDB 7kjr) was refined by MDFF.	MolProbity score (protein) - quality of model: 7kjr (all chains) : 1.40 Our Model: 0.75 EMRinger score (protein) - quality of fit: 7kjr (all chains) : 5.29 Our Model: 5.945
20	T0203EM001_3	T0203	EM001	Daisuke Kihara		After ligand density of a monomer was identified, the centroid of the density was used as the center for small molecule ligand docking. The docking pipeline consists of hydrogen bond optimization, a restrained minimization, and docking via Glide-XP through the Maestro interface. The top five poses are refined via simple MDFF using CHARMM36 force field parameters for protein, lipids, water and ion…	The initial model (PDB 7kjr) was refined by MDFF.	MolProbity score (protein) - quality of model: 7kjr (all chains) : 1.40 Our Model: 0.88 EMRinger score (protein) - quality of fit: 7kjr (all chains) : 5.29 Our Model: 5.24
21	T0201EM001_1	T0201	EM001	Daisuke Kihara		After ligand density of a monomer was identified, the centroid of the density was used as the center for small molecule ligand docking. The docking pipeline consists of hydrogen bond optimization, a restrained minimization, and docking via Glide-XP through the Maestro interface. The top five poses are refined via MDFF in explicit solvent using CHARMM36 force field parameters for protein, water an…	(1) Segmentation, and CA-tracing: We used our segmentation program MAINMASTseg. For each grid point in the map, amino acid type, secondary structures, and atom types were predicted by Emap2sec+. We performed CA-atom tracing by a new version of MAINMAST program. (2) Full-atom model construction: We performed PULCHRA version3.04 with default parameters. (3) Full-atom refinement stage1: We performed…	MolProbity score (protein) - quality of model: 6cvm (chain A) : 1.21 Our Model: 1.25 EMRinger score (protein) - quality of fit: 6cvm (chain A) : 7.68 Our Model: 5.18
22	T0201EM001_2	T0201	EM001	Daisuke Kihara		After ligand density of a monomer was identified, the centroid of the density was used as the center for small molecule ligand docking. The docking pipeline consists of hydrogen bond optimization, a restrained minimization, and docking via Glide-XP through the Maestro interface. The top five poses are refined via MDFF in explicit solvent using CHARMM36 force field parameters for protein, water an…	The initial model (PDB 6cvm) was refined by MDFF.	MolProbity score (protein) - quality of model: 6cvm (chain A) : 1.21 Our Model: 1.00 EMRinger score (protein) - quality of fit: 6cvm (chain A) : 7.68 Our Model: 7.57
23	T0201EM001_3	T0201	EM001	Daisuke Kihara		After ligand density of a monomer was identified, the centroid of the density was used as the center for small molecule ligand docking. The docking pipeline consists of hydrogen bond optimization, a restrained minimization, and docking via Glide-XP through the Maestro interface. The top five poses are refined via MDFF in explicit solvent using CHARMM36 force field parameters for protein, water an…	The initial model (PDB 6cvm) was refined by MDFF.	MolProbity score (protein) - quality of model: 6cvm (chain A) : 1.21 Our Model: 1.01 EMRinger score (protein) - quality of fit: 6cvm (chain A) : 7.68 Our Model: 7.51
24	T0202EM001_1	T0202	EM001	Daisuke Kihara		Knowing the ligand mimics Adenine, We artificially extended an Adenine at the 3’ end of the RNA strand, and manually mutated this residue to match the topology of F86. We broke the covalent bond, and refined the positioning via MDFF in explicit solvent using CHARMM36 force field for protein, nucleic acid, water and ions. The ligand parameters were obtained using CGENFF as distributed by CHARMM-GU…	Initial model (PDB 7bv2) was refined.	n/a
25	T0202EM001_2	T0202	EM001	Daisuke Kihara		After ligand density of a monomer was identified, the centroid of the density was used as the center for small molecule ligand docking. The docking pipeline consists of hydrogen bond optimization, a restrained minimization, and docking via Glide-XP through the Maestro interface. The top five poses are refined via MDFF in explicit solvent using CHARMM36 force field parameters for protein, water an…	Initial model (PDB 7bv2) was refined.	n/a
26	T0201EM005_1	T0201	EM005	Greg Pintilie		phenix.elbow	aligned ligand to segments and refined torsions SWIM for water and ion placement	n/a
27	T0201EM005_2	T0201	EM005	Greg Pintilie		phenix.elbow	placed ligand from phenix.elbow based on segments, refined torsions used SWIM for water and ion placement	n/a
28	T0201EM013_1	T0201	EM013	Abishek Singharoy		For PDB 6CVM, we use PDB coordinates for the ligand, as our pre-screening approach suggested the model to be a high quality model. However, for this target our main objective is to re-fit/optimize the thin hydration shell around the protein. Our protocol can distinguish between the EM and simulation water during analysis, which enables us to indentify water occupancy in the EM density map. Water …	Follwing are the steps of our MDFF protocol: Step1: Protein and ligand system are parameterized using CHARMM36 force field and CHARMM General Force Field (CGenFF) program version 2.4.0 (using CHARMM-GUI web server). Step2: The system with protein (only chain A), ligand (PTQ), EM water and ions are solvated and neutralized. Step3: The EM denisity full-map (EMD-7770) is masked corresponding to that…	MolProbity improved. The initial model MolProbity score was 1.26 (chain A 6cvm) and our submitted model has overall score computed to be 1.03. Cross correlation remained similar. EMRinger was calculated to be 7.45 for our submitted model. As mentioned earlier, our protocol can distinguish between the EM and simulation water during analysis, which enables us to indentify water occupancy in the EM …
30	T0203EM016_1	T0203	EM016	Dilip Kumar		At first, I used a 3-letter code (PEE) for the generating ligand restraint in Phenix eLBOW software. The ligand file generated was the complete structure of PEE (Significantly larger than the Ligand found present in the structure). Finally, to generate the optimized ligand fitted structure, I downloaded the mol2 format file for ligand PEE from 7KJB PDB on RCSB database. Further, I used eLBOW soft…	1)I downloaded the map (emd:22898) from the EMDR webpage and the co-ordinates (7kjr) from the PDB database (RCSB). Further, I Downloaded the .mol2 file for the ligand (PEE). 2)Deleted the ligand and water molecules from the co-ordinate file (7kjr). 3)Run Phenix ligand.fit program in Phenix GUI with the input of coordinate file (no water, no ligand PDB), emd map file, and ligand restraint file (ge…	Phenix Comprehensive Validation for EM and EMRinger
31	T0203EM017_1	T0203	EM017	Simone Weyand		Ligand (Canagliflozin) was chosen from the virtual screening experiment using Schrodinger Glide. A library of FDA approved drugs and bio reference compounds from Enamine were docked into the active site of ORF3a Ion Channel and the top scored hit was chosen. The ligand fitting was optimized using postdock processing on Schrodinger Suite. The ligand was prepared using LigPrep on Schrodinger Suite.	The ligand library was extracted from Enamine and prepared using LigPrep on Schrodinger Suite. Later the prepared library was docked onto the active site of the ORF3a ion channel. Glide docking with reference ligand is used as a benchmark for docking constraints. The top-scored hit with Canagliflozin is optimised using Schrodinger Protein Preparation Wizard and uploaded on the PDB_extract to gene…	The final model was checked using the wwPDB validation service.
32	T0202EM013_1	T0202	EM013	Abishek Singharoy		First, we remove the ligand (F86) from the PDB 7BV2. Next, for the apo-protein-RNA complex in 7BV2 we perform a short molecular dynamics simulation to generate an unbound pose. Using the OpenEye scientific software for small molecule docking we perform an initial docking experiment to indentify potential binding sites. Tens of hundreds of binding sites were indentified of which only one was suppo…	Follwing are the steps of our classical MDFF protocol: Step1: The molecular system consists of protein, RNA, ligand (remdesivir and pyrophosphate), water and ions are parameterized using CHARMM36 force field and CHARMM General Force Field (CGenFF) program version 2.4.0 (using CHARMM-GUI web server). The remdesivir topology matches that of remedesivir monophosphate (RMP). Step2: The molecular syst…	As validattion we calculated, MolProbity, EMRinger, CC to detemine overall model quality and quality of fit. MolProbity score improved for our model (0.73) as compared to PDB model 7BV2 (1.30). EMRinger score for our submitted model (4.766) which improved from the native PDB model 7BV2 (4.557). Additional validation steps include computing strain energy and interaction energy of ligand where the …
33	T0201EM010_1	T0201	EM010	Grzegorz Chojnowski		Standard interface to MON_LIB in COOT	Initial model built using ARP/wARP web-service (v8.1) was further rebuilt manually in ISOLDE (v1.1 rotamers and dihedral angles only). Next, ligands, waters and ions were added in COOT using standard tools (0.9-pre, with a slightly elevated sigma threshold for waters). Ligand binding sites were detected using automated water modeling tools (large blobs). Ions were identified as highly coordinated…	Standard validation tools in COOT (v0.9-pre) and ISOLDE (v1.1); ramachandran plot outliers, backbone geometry, clashes. Additionally, I also used cablam.
34	T0202EM010_1	T0202	EM010	Grzegorz Chojnowski		Standard RNA geometry restraints plus F86 from MON_LIB. Base-pair and stacking restraints generated with a separate program (unpublished).	Initial protein model built using ARP/wARP web-service (v8.1). Initial RNA model was traced automatically with brickworx (http://iimcb.genesilico.pl/brickworx) using an intermediate mtz file with structure factors generated internally by ARP/wARP. The model was further completed and rebuilt in COOT using the external protein sequence assignment program findMySequence (unpublished). RNA chains wer…	Standard validation tools in COOT (v0.9-pre); ramachandran plot outliers, geometry, and clashes. Additionally, I also used cablam.
35	T0203EM010_1	T0203	EM010	Grzegorz Chojnowski		Standard interface to MON_LIB in COOT	Initial model built using ARP/wARP web-service (v8.1) was completed and rebuilt in COOT using the external protein sequence assignment program findMySequence (unpublished). The resulting model was further rebuilt manually in ISOLDE (v1.1 rotamers and dihedral angles only). Next, waters were added in COOT using standard tools (0.9-pre, with a slightly elevated sigma threshold). Ligand binding site…	Standard validation tools in COOT (v0.9-pre) and ISOLDE (v1.1); ramachandran plot outliers, backbone geometry, clashes. Additionally, I also used cablam.
36	T0203EM011_1	T0203	EM011	Maxim Igaev	The cryo-EM density was zoned within 3.5 Ang from the starting model to exclude the nanodisc density using Chimera.	No structure-/geometry-based restraints were applied. Ligand optimization was guided by an atomistic force field.	Starting model was prepared using Chimera/VMD/Modeller. The cryo-EM density was zoned within 3.5 Ang from the starting model to exclude the nanodisc density. Force field: Charmm27 + TIP3P water model. The system was solvated with 0.15 M KCl. Flexible fitting was done for 20 nanoseconds and at T = 100K, with the simulated density resolution and the fitting force constant changing from 0.3 nm to 0.…	Structures were validated via Molprobity/EMRinger/CaBLAM (all available in Phenix 1.14).
37	T0202EM011_1	T0202	EM011	Maxim Igaev	The cryo-EM density's bounds were truncated in Chimera in order for the map to fit the simulations box -- the relevant parts of the density remained unchanged.	No structure-/geometry-based restraints were applied. Ligand optimization was guided by an atomistic force field.	Starting model was prepared using Chimera/VMD/Modeller. The cryo-EM density's bounds were truncated in Chimera in order for the map to fit the simulations box -- the relevant parts of the density remained unchanged. Force field used: Amber99sb + TIP3P water model. The system was solvated with 0.1 M NaCl and 2 mM MgCl2. Flexible fitting was done for 20 nanoseconds and at T = 100K, with the simulat…	The final model was validated via Molprobity/EMRinger/CaBLAM (all available in PHENIX 1.14).
38	T0201EM011_1	T0201	EM011	Maxim Igaev	The cryo-EM density's bounds were truncated in Chimera in order for the map to fit the simulations box -- the relevant parts of the density remained unchanged.	No structure-/geometry-based restraints were applied. Ligand optimization was guided by an atomistic force field.	Starting model was prepared using Chimera/VMD/Modeller. The cryo-EM density's bounds were truncated in Chimera in order for the map to fit the simulation box -- the relevant parts of the density remained unchanged. Force field: Amber99sb + TIP3P water model. The system was solvated with 0.15 M KCl. Flexible fitting was done for 20 nanoseconds and at T = 100K, with the simulated density resolution…	The final model was validated via Molprobity/EMRinger/CaBLAM (all available in PHENIX 1.14).
39	T0202EM012_1	T0202	EM012	Colin Palmer		Ligand restraints for remdesivir were generated using CCP4 AceDRG version 223, using the mmCIF file for F86 from the PDB Chemical Component Dictionary as input. Restraints for nucleotides and their covalent linkages were generated using CCP4 AceDRG version 224. When creating the link dictionary, atom names and bond orders for the F86 phosphate oxygens were specified to match the atom names in the…	ProSMART v0.859 was used to compare and analyse homologues to identify the most suitable starting model, find regions with structural inconsistencies to guide manual modelling, and to explore possibilities for generation of refinement restraints. The reference model PDB 7bv2 was chosen as the starting model. A mask was generated from atomic model coordinates using EMDA v1.1.3. The map was trimmed…	The working and final models were validated using the following validation tools in Coot (v0.9.4 and v0.9.5): Ramachandran plot, Difference map peaks, Check/delete waters, Geometry analysis, Peptide omega analysis, Rotamer analysis, Probe clashes, Validation Outliers. The final model was validated using coot-ligand-validation (v0.9.4) to check compliance with the ligand dictionary, and the Valida…
40	T0202EM005_1	T0202	EM005	Greg Pintilie		used phenix.elbow with SMILES string from https://www.rcsb.org/ligand/F86 c1cc(n2c1c(ncn2)N)[C@]3([C@@H]([C@@H]([C@H](O3)COP(=O)(O)O)O)O)C#N	segmented map, added ligand to selected regions, refined dihedrals to fit to regions, then ran SWIM to add waters and ions	n/a
41	T0201EM015_1	T0201	EM015	Gunnar Schroeder	We filtered the map to 2.5 A using a top-hat (sharp) filter for cross-validation.	The force field parameters of the ligand were generated by the CHARMM General Force Field (CGenFF).	Gromacs (CDMD) refinement for 300ps to a map that was filtered to was low-pass filtered to 2.5 Ang. We used the CHARMM-36 force field. We selected frames from the trajectory by a combination of different criteria, most importantly the (cross-validated) map fit, calculated from a map correlation between band-pass filtered (1.9 - 2.5 A) model and EM maps. The selected frames were averaged and energ…	Validation is performed by selecting frames from the simulation based on cross-validated map fit (as described under Modelling details), protein-ligand interaction energy, number protein-ligand h-bonds, clashscore, and Ramachandran outliers. Only those selected frames were used for averaging and final minimization.
42	T0203EM012_1	T0203	EM012	Colin Palmer		Ligand restraints were generated using CCP4 AceDRG version 223, using the mmCIF file for PEE from the PDB Chemical Component Dictionary as input.	ProSMART v0.859 was used to compare and analyse possible homologues to identify the most suitable starting model, find regions with structural inconsistencies to guide manual modelling, and to explore possibilities for generation of refinement restraints. Additional maps were generated from the EMD-22898 half maps using EMDA v1.1.3 ("bestmap") and LAFTER v1.1. These maps were not used for refinem…	The working and final models were validated using the following validation tools in Coot (v0.9.4 and 0.9.5): Ramachandran plot, Difference map peaks, Check/delete waters, Geometry analysis, Peptide omega analysis, Rotamer analysis, Probe clashes, Validation Outliers. The final model was validated using coot-ligand-validation (v0.9.4) to check compliance with the ligand dictionary, and the Validat…
43	T0203EM009_1	T0203	EM009	Nigel Moriarty		Ligand restraints generated using phenix.elbow	1. Ligand restraints generated using phenix elbow 2. Ligands placed into position using phenix LigandFit 3. Alternative conformations built using Coot 4. Water built in de-novo using phenix.douse (http://phenix-online.org/presentations/water.pdf) Water assigned to nearest macromolecule chain, given a new chain id: Macromolecule chain : attributed water chain A:U B:V C:W D:X 5. Refinement done usi…	Phenix Cryo-EM Comprehensive validation
44	T0201EM012_1	T0201	EM012	Colin Palmer		Ligand restraints were generated using CCP4 AceDRG version 223, using the mmCIF file for PTQ from the PDB Chemical Component Dictionary as input.	ProSMART v0.859 was used to compare and analyse other beta-galactosidase structures to identify the most suitable starting model, find regions with structural inconsistencies to guide manual modelling, and to explore possibilities for generation of refinement restraints. Additional maps were generated from the EMD-7770 half maps using EMDA v1.1.3 ("bestmap") and LAFTER v1.1. These maps were not u…	The working and final models were validated using the following validation tools in Coot (v0.9.4 and v0.9.5): Ramachandran plot, Difference map peaks, Check/delete waters, Geometry analysis, Peptide omega analysis, Rotamer analysis, Probe clashes, Validation Outliers. The models were also validated using coot-ligand-validation (v0.9.4) to check compliance with the ligand dictionary, and the Valid…
46	T0203EM005_1	T0203	EM005	Greg Pintilie		phenix.elbow with name PEE	segmented ligand, added ligand and fitted into segmented density, added waters and ions with SWIM	n/a
47	T0202EM009_1	T0202	EM009	Nigel Moriarty		phenix elbow	1. Ligand restraints generated using phenix elbow 2. Ligands placed into position using phenix LigandFit 3. Alternative conformations built using Coot 4. Water built in de-novo using phenix.douse (http://phenix-online.org/presentations/water.pdf) Water assigned to nearest macromolecule chain, given a new chain id: Macromolecule chain : attributed water chain A:U B:V C:W P:Y T:Z 5. Refinement done…	Phenix Cryo-EM comprehensive validation
49	T0201EM009_1	T0201	EM009	Nigel Moriarty		Phenix elbow	1. Ligand restraints generated using phenix elbow 2. Ligands placed into position using phenix LigandFit 3. Alternative conformations built using Coot 4. Water built in de-novo using phenix.douse (http://phenix-online.org/presentations/water.pdf) Water assigned to nearest macromolecule chain, given a new chain id: Macromolecule chain : attributed water chain A:U B:V C:W D:X 5. Refinement done usi…	Phenix Cryo-EM Validation
50	T0201EM002_1	T0201	EM002	Dong Si		I used OpenBabel (http://www.cheminfo.org/Chemistry/Cheminformatics/FormatConverter/index.html) to transform the model SDF to a PDB file and used it for Phenix LigandFit.	(1) Generated the model with our ab-initio prediction tool DeepTracer. (2) Transformed the ligand model SDF to PDB using OpenBabel. (3) Fitted the ligand (PTQ) into the model using Phenix LigandFit (resolution=1.9, #copies=4, #conformer=2 to use ELBOW) (4) Merged the protein model and the 4 fitted ligands into a single PDB using Chimera. (5) Generated CIF file using Phenix Elbow (6) Refined the m…	We used Molprobity to evaluate the model performance (Clashscore, MolProbity Score, Bond Length/Angle RMSD, Rotamer Outliers, etc).
51	T0202EM008_1	T0202	EM008	Paul Emsley		Using Acedrg on CCD F86 for monomer, and use Acedrg for link also	Refine with Refmac, then RSR with Coot, using torsion, planar peptide restraints, trans peptide restraints, Ramachandran restraints.	Coot, molprobity.molprobity	The map was blurred internally in Refmac. Blur 10.
52	T0203EM002_1	T0203	EM002	Dong Si		I used OpenBabel (http://www.cheminfo.org/Chemistry/Cheminformatics/FormatConverter/index.html) to transform the model SDF to a PDB file and used it for Phenix LigandFit.	(1) Generated the model with our ab-initio prediction tool DeepTracer. (2) Transformed the ligand model SDF to PDB using OpenBabel. (3) Fitted the ligand into the model using Phenix LigandFit (resolution=2.08, #copies=2, #conformer=2 to use ELBOW) (4) Merged the protein model and the 2 fitted ligands into a single PDB using Chimera. (5) Generated CIF file using Phenix Elbow (6) Refined the model …	We used Molprobity to evaluate the model performance (Clashscore, MolProbity Score, Bond Length/Angle RMSD, Rotamer Outliers, etc).
53	T0202EM002_1	T0202	EM002	Dong Si		I used OpenBabel (http://www.cheminfo.org/Chemistry/Cheminformatics/FormatConverter/index.html) to transform the model SDF to a PDB file and used it for Phenix LigandFit.	(1) Generated the model with our ab-initio prediction tool DeepTracer. (2) Transformed the ligand model SDF to PDB using OpenBabel. (3) Fitted the ligand into the model using Phenix LigandFit (resolution=2.5, #copies=1, #conformer=2 to use ELBOW) (4) Merged the protein model and the fitted ligand into a single PDB using Chimera. (5) Generated CIF file using Phenix Elbow (6) Refined the model with…	We used Molprobity to evaluate the model performance (Clashscore, MolProbity Score, Bond Length/Angle RMSD, Rotamer Outliers, etc).
54	T0203EM008_1	T0203	EM008	Paul Emsley		Standard CCP4 monomer library for PEE	Fitted the ligand in Coot - the whole ligand. There was little to no density for the tails. Then refine in Refmac. The B-factors for the ligand went up. Ramachandran, torsions, planar peptide, trans-peptide, rotamer restraints enabled.	molprobity.molprobity Coot Outlier validation	The map was blurred internally in Refmac, B = 20 A2.
55	T0201EM002_2	T0201	EM002	Dong Si		I used OpenBabel (http://www.cheminfo.org/Chemistry/Cheminformatics/FormatConverter/index.html) to transform the model SDF to a PDB file and used it for Phenix LigandFit.	(1) Removed the ligands, ion, and water from the reference model using Chimera. (2) Transformed the ligand model SDF to PDB using OpenBabel. (3) Fitted the ligand (PTQ) into the model using Phenix LigandFit (resolution=1.9, #copies=4, #conformer=2 to use ELBOW) (4) Merged the protein model and the 4 fitted ligands into a single PDB using Chimera. (5) Generated CIF file using Phenix Elbow (6) Refi…	We used Molprobity to evaluate the model performance (Clashscore, MolProbity Score, Bond Length/Angle RMSD, Rotamer Outliers, etc).
56	T0203EM002_2	T0203	EM002	Dong Si		I used OpenBabel (http://www.cheminfo.org/Chemistry/Cheminformatics/FormatConverter/index.html) to transform the model SDF to a PDB file and used it for Phenix LigandFit.	(1) Removed the ligands, ion, and water from the reference model using Chimera. (2) Transformed the ligand model SDF to PDB using OpenBabel. (3) Fitted the ligand (PEE) into the model using Phenix LigandFit (resolution=2.08, #copies=2, #conformer=2 to use ELBOW) (4) Merged the protein model and the 2 fitted ligands into a single PDB using Chimera. (5) Generated CIF file using Phenix Elbow (6) Ref…	We used Molprobity to evaluate the model performance (Clashscore, MolProbity Score, Bond Length/Angle RMSD, Rotamer Outliers, etc).
57	T0202EM002_2	T0202	EM002	Dong Si		I used OpenBabel (http://www.cheminfo.org/Chemistry/Cheminformatics/FormatConverter/index.html) to transform the model SDF to a PDB file and used it for Phenix LigandFit.	(1) Removed the ligands, ion, and water from the reference model using Chimera. (2) Transformed the ligand model SDF to PDB using OpenBabel. (3) Fitted the ligand (F86) into the model using Phenix LigandFit (resolution=2.5, #copies=1, #conformer=2 to use ELBOW) (4) Merged the protein model and the fitted ligand into a single PDB using Chimera. (5) Generated CIF file using Phenix Elbow (6) Refined…	We used Molprobity to evaluate the model performance (Clashscore, MolProbity Score, Bond Length/Angle RMSD, Rotamer Outliers, etc).
58	T0201EM008_1	T0201	EM008	Paul Emsley		Run acedrg on CCD PTQ	Using Coot, add an alt conf for the ligand and water. Refine that with Refmac using B blur 10 A and occupancy refinement. Refine that with Coot RSR, torsion, planar peptide restraints, Ramachandran restraints, trans-peptide restraints, rotamer restraints applied. Geometry weights turned up to half that from "Estimate", Rama weights to 20. Torsion weights to 3. There were 6 outliers, I recentered …	Used Coot Validation outliers, then ran molprobity.molprobity to see what it had to say. There is something wrong with the non-bonded contact restraints in this one. It will be a intricate job to find out what though.	Map was internally blurred by Refmac, B = 10.
59	T0203EM003_2	T0203	EM003	Andrew Muenks		Here is our general ligand processing pipeline. Preparing a ligand for docking is an important first step that is often error prone. Below are steps that should be taken when preparing ligands starting from an SDF file, the filetype used by the PDB to represent ligands. **Step 0.** If you are starting with a pdb or mol2 file, your file can be converted to the sdf format using [openbabel](http://o…	Here is the general pipeline for our ligand modeling. More specific details of the scripts and xml files used can be provided if needed or featured on our lab website at a later date. The starting structure for each case was generated in Chimera by deleting all ligands and the resulting model was saved to {pdb name}_no_ligs.pdb. 1. Cleaned the PDB file by using the command: grep -E '^ATOM' {pdb n…	Side chain conformations were validated using phenix.molprobity
60	T0202EM003_1	T0202	EM003	Andrew Muenks		Here is our general ligand processing pipeline. Preparing a ligand for docking is an important first step that is often error prone. Below are steps that should be taken when preparing ligands starting from an SDF file, the filetype used by the PDB to represent ligands. **Step 0.** If you are starting with a pdb or mol2 file, your file can be converted to the sdf format using [openbabel](http://o…	Here is the general pipeline for our ligand modeling. More specific details of the scripts and xml files used can be provided if needed or featured on our lab website at a later date. The starting structure for each case was generated in Chimera by deleting all side chains within 10Å of the small molecule and 5Å of ions using the command: select #model_num:lig_num z<10.0 & ~@n,ca,c,o for small mo…	Side chain conformations were validated using phenix.molprobity. Metal coordination geometry was compared to the reference model by using the CheckMyMetal webserver.
61	T0202EM003_2	T0202	EM003	Andrew Muenks		Here is our general ligand processing pipeline. Preparing a ligand for docking is an important first step that is often error prone. Below are steps that should be taken when preparing ligands starting from an SDF file, the filetype used by the PDB to represent ligands. **Step 0.** If you are starting with a pdb or mol2 file, your file can be converted to the sdf format using [openbabel](http://o…	Here is the general pipeline for our ligand modeling. More specific details of the scripts and xml files used can be provided if needed or featured on our lab website at a later date. The starting structure for each case was generated in Chimera by deleting all side chains within 10Å of the small molecule and 5Å of ions using the command: select #model_num:lig_num z<10.0 & ~@n,ca,c,o for small mo…	Side chain conformations were validated using phenix.molprobity. Metal coordination geometry was compared to the reference model by using the CheckMyMetal webserver.
62	T0201EM003_1	T0201	EM003	Andrew Muenks		Here is our general ligand processing pipeline. Preparing a ligand for docking is an important first step that is often error prone. Below are steps that should be taken when preparing ligands starting from an SDF file, the filetype used by the PDB to represent ligands. **Step 0.** If you are starting with a pdb or mol2 file, your file can be converted to the sdf format using [openbabel](http://o…	Here is the general pipeline for our ligand modeling. More specific details of the scripts and xml files used can be provided if needed or featured on our lab website at a later date. The starting structure for each case was generated in Chimera by deleting all ligands and the resulting model was saved to {pdb name}_no_ligs.pdb. 1. Cleaned the PDB file by using the command: grep -E '^ATOM' {pdb n…	Side chain conformations were validated using phenix.molprobity. Metal coordination geometry was compared to the reference model by using the CheckMyMetal webserver.
63	T0201EM002_3	T0201	EM002	Dong Si		I used OpenBabel (http://www.cheminfo.org/Chemistry/Cheminformatics/FormatConverter/index.html) to transform the model SDF to a PDB file and used it for Phenix LigandFit.	(1) Generated the model with our ab-initio prediction tool DeepTracer. (2) Transformed the ligand model SDF to PDB using OpenBabel. (3) Fitted the ligand (PTQ) into the model using Phenix LigandFit (resolution=1.9, #copies=4, #conformer=2 to use ELBOW) (4) Merged the protein model and the 4 fitted ligands into a single PDB using Chimera.	We used Molprobity to evaluate the model performance (Clashscore, MolProbity Score, Bond Length/Angle RMSD, Rotamer Outliers, etc).
64	T0201EM003_2	T0201	EM003	Andrew Muenks		Here is our general ligand processing pipeline. Preparing a ligand for docking is an important first step that is often error prone. Below are steps that should be taken when preparing ligands starting from an SDF file, the filetype used by the PDB to represent ligands. **Step 0.** If you are starting with a pdb or mol2 file, your file can be converted to the sdf format using [openbabel](http://o…	Here is the general pipeline for our ligand modeling. More specific details of the scripts and xml files used can be provided if needed or featured on our lab website at a later date. The starting structure for each case was generated in Chimera by deleting all ligands and the resulting model was saved to {pdb name}_no_ligs.pdb. 1. Cleaned the PDB file by using the command: grep -E '^ATOM' {pdb n…	Side chain conformations were validated using phenix.molprobity. Metal coordination geometry was compared to the reference model by using the CheckMyMetal webserver.
65	T0201EM003_3	T0201	EM003	Andrew Muenks		Here is our general ligand processing pipeline. Preparing a ligand for docking is an important first step that is often error prone. Below are steps that should be taken when preparing ligands starting from an SDF file, the filetype used by the PDB to represent ligands. **Step 0.** If you are starting with a pdb or mol2 file, your file can be converted to the sdf format using [openbabel](http://o…	Here is the general pipeline for our ligand modeling. More specific details of the scripts and xml files used can be provided if needed or featured on our lab website at a later date. The starting structure for each case was generated in Chimera by deleting all ligands and the resulting model was saved to {pdb name}_no_ligs.pdb. 1. Cleaned the PDB file by using the command: grep -E '^ATOM' {pdb n…	Side chain conformations were validated using phenix.molprobity
66	T0203EM002_3	T0203	EM002	Dong Si		I used OpenBabel (http://www.cheminfo.org/Chemistry/Cheminformatics/FormatConverter/index.html) to transform the model SDF to a PDB file and used it for Phenix LigandFit.	(1) Generated the model with our ab-initio prediction tool DeepTracer. (2) Transformed the ligand model SDF to PDB using OpenBabel. (3) Fitted the ligand (PPE) into the model using Phenix LigandFit (resolution=2.08, #copies=2, #conformer=2 to use ELBOW) (4) Merged the protein model and the 2 fitted ligands into a single PDB using Chimera.	We used Molprobity to evaluate the model performance (Clashscore, MolProbity Score, Bond Length/Angle RMSD, Rotamer Outliers, etc).

## Sheet: Teams
Team ID	Modeler Team Lead	Team
EM001	Daisuke Kihara	Daisuke Kihara, Genki Terashi, Daipayan Sarkar, Jacob Verburgt
EM002	Dong Si	Dong Si, Sean Lin, Minglei Zhao, Renzhi Cao, Jie Hou
EM003	Andrew Muenks	Andrew Muenks, Frank DiMaio
EM004	Jianlin Cheng	Jianlin Cheng, Nabin Giri
EM005	Greg Pintilie	Greg Pintilie, Michael Schmid, Wah Chiu
EM006	Matt Baker	Matthew Baker, Corey Hryc
EM007	Alberto Perez	Alberto Perez, Arup Mondal, Reza Esmaeli, Lijun Lang
EM008	Paul Emsley	Paul Emsley
EM009	Nigel Moriarty	Nigel Moriarty, Pavel Afonine, Christopher Schlicksup, Oleg Sobolev
EM010	Grzegorz Chojnowski	Grzegorz Chojnowski
EM011	Maxim Igaev	Maxim Igaev, Helmut Grubmüller, Emmi Pohjolainen, Maxim Igaev, Andrea Vaiana
EM012	Colin Palmer	Colin Palmer, Rob Nicholls, Rangana Warshamanage, Keitaro Yamashita, Garib Murshudov, Paul Bond, Scott Hoh, Mateusz Olek, Kevin Cowtan, Agnel Joseph, Tom Burnley, Martyn Winn
EM013	Abishek Singharoy	Abishek Singharoy, Sumit Mittal, Alberto Perez, Daisuke Kihara, Mrinal Shekhar, Daipayan Sarkar, Genki Terashi, Chris Rowley, Reza Esmaeli, Lijun Lang, Arup Mondal, Arthur Campbell
EM014	Wei-Chun Kao	Wei-Chun Kao
EM015	Gunnar Schroeder	Gunnar Schröder, Luisa Schäfer, Karunakar R. Pothula
EM016	Dilip Kumar	Dilip Kumar
EM017	Simone Weyand	Simone Weyand, Sundeep Chaitanya, Tom Blundell, Steven Brohawn
