# Supplementary material for: Outcomes of the EMDataResource Cryo-EM Ligand Modeling Challenge
Source: Research Square preprint supplement (doi:10.21203/rs.3.rs-3864137/v1), 2024-01-25
Supplement: Supplementary file 2 [file fa5635f3d4e714de73a926b2.xlsx]

## Sheet: Definitions
Fit-to-Map Tab	Scores reported by Model ID	Source*	Figure
Model	Model ID=combination of Target ID, Group ID, and Model # (groups could submit multiple models per target)	MCP
Map	EMDB map id	EMDB
Resol	EMDB map reported resolution	EMDB
TEMPy CCC	full grid map versus model-map density correlation coefficient	MCP
TEMPY SMOC	Segment Manders’ Overlap, map versus model-map density, only modeled regions	MCP
Phenix CCbox	Phenix full grid map versus model-map density correlation coefficient	MCP
PhenixCCmask	Phenix map versus model-map density, only modeled regions	MCP
PhenixCCvol	Phenix map versus model-map density, mask of points with the highest values in the model-map	MCP
PhenixCCpeaks	Phenix map versus model-map density, only high-density map and model regions	MCP
PhenixFSC05	Phenix Resolution (distance) of Map-Model FSC curve read at point FSC = 0.5	MCP	Figure 3
EMRinger	evaluates backbone by sampling map density around Cɣ-atom ring paths for nonbranched residues	MCP	Figure 3
Q-protein	Q-score map density at each modeled atom versus reference Gaussian density function, average over all non-H protein polymer atoms	AT07	Figure 3
Ligand	PDB Chemical Component Dictionary ID of Ligand of Interest	PDB
Q-Ligand	Q-score map density at each modeled atom versus reference Gaussian density function, average over all non-H ligand atoms	AT07	Figure 3
LIVQ5	Q-score map density at each modeled atom versus reference Gaussian density function, average over all ligand and <=5 Å environment non-H atoms	AT07	Figure 4
LIVQ10	Q-score map density at each modeled atom versus reference Gaussian density function, average over all ligand and <=10 Å environment non-H atoms	AT07	Ext Data Figure 2
Q-HOH	Q-score map density at each modeled atom versus reference Gaussian density function, average over all water O atoms	AT07
Q-MG	Q-score map density at each modeled atom versus reference Gaussian density function, average over all Mg ion atoms	AT07
Q-NA	Q-score map density at each modeled atom versus reference Gaussian density function, average over all Na ion atoms	AT07
Q-POP	Q-score map density at each modeled atom versus reference Gaussian density function, average over all pyrophosphate non-H ligand atoms	AT07
Q-ZN	Q-score map density at each modeled atom versus reference Gaussian density function, average over all Zn ion atoms	AT07
AtomIncl-All	EMDB all Atom Inclusion, percentage of atoms inside depositor-provided density threshold	MCP
Atom Incl-BB	EMDB backbone-only Atom Inclusion, percentage of atoms inside depositor-provided density threshold	MCP
Model-only Tab	Scores reported by Model ID
Model	Model ID=combination of Target ID, Group ID, and Model # (groups could submit multiple models per target)	MCP
MP score	MolProbity Overall Score	MCP
MP clash	MolProbity Clashscore Number of steric overlaps ≥0.4 Å per 1,000 atoms	MCP	Figure 3
MP rota out	MolProbity Rotamer sidechain conformation outliers	MCP
MP rama out	MolProbity Rama Ramachandran ɸ,ψ main chain conformation outliers	MCP
MP rama fav	MolProbity Rama Ramachandran ɸ,ψ main chain conformation favored	MCP
MP Cablam conf	MolProbity CaBLAM outliers CO-based virtual dihedrals	MCP	Figure 3
MP Cablam ca	MolProbity CaBLAM outliers Cɑ-based virtual dihedrals	MCP
MP RNAsuite	MolProbity RNA suiteness % outliers	MCP
MP RNApucker	MolProbity RNA sugar pucker % outliers	MCP
MP HOH clash	MolProbity UnDowser HOH Clash, %	MCP	Figure 3
Ligand	PDB Chemical Component Dictionary ID of Ligand of Interest	MCP
MOG angl rmsz	Mogul/PDB Angle RMSZ	AT01
MOG bond rmsz	Mogul/PDB Bond RMSZ	AT01
MOG angl out	Mogul/PDB # Angle Outliers (average over all individual ligand instances)	AT01
MOG bond out	Mogul/PDB # Bond Outliers (average over all individual ligand instances)	AT01
MOG chiral out	Mogul/PDB # Chiral Outliers (average over all individual ligand instances)	AT01
MOG ring out	Mogul/PDB # Aromatic Ring Outliers (average over all individual ligand instances)	AT01
MOG torsion out	Mogul/PDB # Torsion Outliers (average over all individual ligand instances)	AT01
MP clash ligand	MogulPDB # Ligand atoms with clashes (average over all individual ligand instances)	AT01
MOG complete	Mogul/PDB % completeness of Ligand model (average over all individual ligand instances)	AT01
MOG composite	Mogul/PDB composite ranking score (percentile relative to all ligands in PDB macromolecular crystallography entries)	AT01	Figure 3
Strain MM	Strain Energy Molecular Mechanics Forcefield	AT06	Figure 3
Strain NNP	Strain Energy Neural Net Potential Energy	AT06
Pharmacore PH4	Pharmacophore consensus field ligand pose score	AT05	Figure 3
DNATCOconfal	DNATCO Nucleic Acid Conformational Analysis Quality Score	AT03	Figure 3
DNATCO%	Percentile placement of DNATCO Nucleic Acid Conformational Analysis Quality Score Percentile relative to other structures	AT03
DNATCOrmsd	Overall Cartesian RMSD of dinucleotide suite coordinates from assigned conformer class	AT03
Model-vs-Reference Tab	Scores reported by model individual protein chain instance
Target_Chain	Target ID + Chain ID	MCP
Model_Chain	Model ID + Chain ID	MCP
LDDT	LDDT Local Difference Distance Test, superposition-free comparison of all-atom distance maps between model and reference	MCP
CAD	CAD Contact Area Difference, superposition-free measure of differences in interatom contacts	MCP
RMSD	OpenStructure/QS CaRMSD r.m.s.d. of Cɑ atoms	MCP
GDT_TS	Local Global Alignment (LGA) GDT-TS Global Distance Test Total Score, average percentage of model Cɑ that superimpose with reference Cɑ, multiple distance cutoffs	MCP
GDT_HA	LGA GDT-HA Global Distance Test "High Accuracy", different set of distance cutoffs	MCP
GDC_ALL	LGA GDC Global Distance Calculation, average percentage of all model atoms that superimpose with reference, multiple distance cutoffs	MCP
GDC_SC	LGA GDC-SC Global Distance Calculation for sidechain atoms only	MCP
Comparison-Among-Models Tab	Scores reported by model individual protein chain instance
Target_Chain	Target ID + Chain ID	MCP
Model_Chain	Model ID + Chain ID	MCP
Davis_QA	DAVIS-QA average of pairwise LGA GDT-TS scores among submitted models	MCP
Ligand per-Instance Tab	Scores reported by model individual ligand instance
Model	Model ID=combination of Target ID, Group ID, and Model # (groups could submit multiple models per target)	MCP
Ligand	PDB Chemical Component Dictionary ID of Ligand of Interest	PDB
Chain	Chain ID of Ligand instance	PDB
Residue#	Residue # of Ligand	PDB
MP Probe Score	All atom contact analysis using probe spheres	AT04
MP clash ligand	Molprobity/wwPDB Report # of clashes involving ligand atoms	AT01
MOG angl rmsz	Mogul/wwPDB Report Angle RMSZ	AT01
MOG bond rmsz	Mogul/wwPDB Report Bond RMSZ	AT01
MOG bond out	Mogul/wwPDB Report # Bond Outliers	AT01
MOG angl out	Mogul/wwPDB Report # Angle Outliers	AT01
MOG tors out	Mogul/wwPDB Report # Torsion Outliers	AT01
AtomIncl ligand	EMDB atom inclusion per ligand, percentage of atoms inside depositor-provided density threshold	AT01
Q-Ligand	Q-score map density at each modeled atom versus reference Gaussian density function, average over all non-H ligand atoms for Chain ID	AT07
Q-MG	Q-score map density at each modeled atom versus reference Gaussian density function, average over all Mg ion atoms for Chain ID	AT07
Q-NA	Q-score map density at each modeled atom versus reference Gaussian density function, average over all Na ion atoms for Chain ID	AT07
Q-ZN	Q-score map density at each modeled atom versus reference Gaussian density function, average over all Zn ion atoms for Chain ID	AT07
Q-HOH	Q-score map density at each modeled atom versus reference Gaussian density function, average over all water O atoms for Chain ID	AT07
Strain MM	Strain Energy Molecular Mechanics Forcefield	AT06
Strain NNP	Strain Energy Neural Net Potential	AT06
*Source key:
AT01	C. Shao
AT02	P. Emsley
AT03	B. Schneider, J. Černý
AT04	J. Richardson, C.J. Williams, V. Chen, D. Richardson
AT05	C.I. Williams, Chemical Computing Group Support Team
AT06	B. Sellers, A. Gobbi, Y. Yang, A. Rohou
AT07	G. Pintilie, M. Schmid, W. Chiu
MCP	Model Compare Pipeline

## Sheet: Fit-to-Map
Model	Map	Resol	TEMPy CCC	TEMPY SMOC	Phenix CCbox	PhenixCCmask	PhenixCCvol	PhenixCCpeaks	PhenixFSC05	EMRinger	Q-protein	Ligand	Q-Ligand	LIVQ5	LIVQ10	Q-HOH	Q-MG	Q-NA	Q-POP	Q-ZN	AtomIncl-All	Atom Incl-BB
T0201EM001_1	emd_7770	1.9	0.37	0.61	0.43	0.62	0.64	0.3	2.58	5.18	0.74	PTQ	0.33	0.58	0.63	0.17
T0201EM001_2	emd_7770	1.9	0.39	0.65	0.46	0.67	0.67	0.33	2.28	7.57	0.81	PTQ	0.65	0.8	0.82	0.32	0.64	0.49
T0201EM001_3	emd_7770	1.9	0.39	0.65	0.46	0.67	0.68	0.34	2.27	7.51	0.81	PTQ	0.62	0.79	0.82	0.34	0.73	0.9
T0201EM002_1	emd_7770	1.9	0.73	0.62	0.82	0.86	0.85	0.8	2.2	3.32	0.71	PTQ	0.55	0.68	0.69	0.64					0.84	0.94
T0201EM002_2	emd_7770	1.9	0.79	0.67	0.87	0.94	0.94	0.87	2.09	7.31	0.81	PTQ	0.72	0.81	0.83	0.81					0.92	0.98
T0201EM002_3	emd_7770	1.9	0.65	0.55	0.74	0.74	0.74	0.69	2.69	1.99	0.58	PTQ	0.6	0.29	0.47	0.34					0.72	0.92
T0201EM003_1	emd_7770	1.9	0.39	0.67	0.52	0.87	0.85	0.37	2.1	7.62	0.82	PTQ	0.71	0.82	0.83	0.89	0.87	0.87			0.55	0.99
T0201EM003_2	emd_7770	1.9	0.39	0.67	0.58	0.87	0.85	0.47	2.09	7.6	0.82	PTQ	0.71	0.82	0.83	0.88	0.87	0.88			0.55	0.99
T0201EM003_3	emd_7770	1.9	0.39	0.67	0.57	0.86	0.84	0.46	2.1	7.63	0.82	PTQ	0.03	0.66	0.8	0.88	0.85	0.66			0.54	0.99
T0201EM004_1	emd_7770	1.9	0.69	0.58	0.62	0.59	0.68	0.57	2.76	3.46	0.65	PTQ	0.71	0.57	0.66		0.89	0.87
T0201EM004_2	emd_7770	1.9	0.45	0.34	0.36	0.27	0.39	0.25	8.2	0.64	0.26	PTQ	0.45	0.52	0.53		0.54	0.57			0.37	0.57
T0201EM005_1	emd_7770	1.9	0.79	0.67	0.77	0.79	0.8	0.74	2.85	7.66	0.82	PTQ	0.73	0.82	0.83	0.9	0.89	0.86			0.91	0.99
T0201EM005_2	emd_7770	1.9	0.79	0.67	0.77	0.79	0.8	0.74	2.85	7.66	0.82	PTQ	0.81	0.83	0.84	0.9	0.89	0.86			0.91	0.99
T0201EM006_1	emd_7770	1.9	0.78	0.67	0.84	0.91	0.91	0.84	2.1	6.43	0.81	PTQ	0.79	0.83	0.82	0.85	0.89	0.88			0.91	0.98
T0201EM007_1	emd_7770	1.9	0.72	0.58							0.73	PTQ	0.31	0.52	0.73	0.53	0.66	0.57			0.55	0.93
T0201EM008_1	emd_7770	1.9	0.38	0.64						6.89		PTQ									0.54	0.98
T0201EM009_1	emd_7770	1.9	0.78	0.67	0.87	0.93	0.93	0.87	2.09	6.45	0.81	PTQ	0.78	0.82	0.83	0.92	0.89	0.89			0.91	0.98
T0201EM010_1	emd_7770	1.9	0.78	0.67	0.84	0.92	0.92	0.83	2.1	7	0.81	PTQ	0.69	0.8	0.81	0.93	0.9				0.92	0.98
T0201EM011_1	emd_7770	1.9	0.77	0.63	0.75	0.72	0.78	0.71	2.15	7.11	0.79	PTQ	0.64	0.76	0.79		0.87	0.86			0.54	0.98
T0201EM012_1	emd_7770	1.9	0.39	0.68	0.57	0.95	0.94	0.4	2.08	7.45	0.82	PTQ	0.81	0.84	0.84	0.85	0.9	0.91			0.92	0.98
T0201EM013_1	emd_7770	1.9	0.39	0.65	0.49	0.71	0.72	0.38	2.17	7.44	0.81	PTQ	0.63	0.79	0.82	0.48	0.56	0.91
T0201EM014_1	emd_7770	1.9	0.39	0.65	0.5	0.89	0.89	0.29	2.1	7.22	0.81	PTQ	0.82	0.83	0.83	0.86	0.91	0.89			0.64	0.98
T0201EM015_1	emd_7770	1.9	0.77	0.63	0.73	0.7	0.77	0.7	2.17	6.98	0.78	PTQ	0.77	0.82	0.79	0.8	0.7	0.9			0.53	0.97
T0201EM6cvm	emd_7770	1.9	0.79	0.67	0.81	0.91	0.91	0.81	2.1	7.66	0.82	PTQ	0.71	0.81	0.83	0.86	0.91	0.88			0.92	0.99
T0202EM001_1	emd_30210	2.5	0.56	0.54						4.6	0.7	F86	0.61	0.66	0.71	0.55			0.48	0.75	0.48	0.85
T0202EM001_2	emd_30210	2.5	0.54	0.52						3.98	0.65	F86	0.59	0.65	0.67		0.15		0.03
T0202EM002_1	emd_30210	2.5	0.56	0.6	0.71	0.81	0.78	0.7	2.7	3.8	0.7	F86		0.42	0.67	0.61					0.8	0.86
T0202EM002_2	emd_30210	2.5	0.6	0.6	0.72	0.84	0.82	0.72	2.67	4.19	0.73	F86	0.68	0.73	0.75	0.66					0.82	0.88
T0202EM003_1	emd_30210	2.5	0.58	0.57	0.76	0.83	0.82	0.77	2.66	5.12	0.72	F86	0.68	0.75	0.77	0.65	0.68		0.53	0.84	0.5	0.88
T0202EM003_2	emd_30210	2.5	0.58	0.52	0.75	0.83	0.82	0.76	2.66	5.19	0.71	F86	0.68	0.7	0.74	0.73	0.72		0.51	0.83	0.5	0.87
T0202EM004_1	emd_30210	2.5	0.53	0.56	0.64	0.65	0.66	0.59	3.12	1.42	0.61	F86	0.74	0.66	0.66		0.89		0.61	0.72
T0202EM004_2	emd_30210	2.5	0.42	0.38	0.46	0.45	0.47	0.38	4.18	1.16	0.39	F86	0.5	0.31	0.39		0.66		0.4	0.51	0.41	0.65
T0202EM005_1	emd_30210	2.5	0.59	0.6	0.76	0.82	0.81	0.77	2.77	4.56	0.72	F86	0.68	0.72	0.74	0.83			0.56	0.81	0.81	0.87
T0202EM006_1	emd_30210	2.5	0.59	0.59							0.72	F86	0.69	0.71	0.73	0.84	0.88			0.81	0.81	0.86
T0202EM007_1	emd_30210	2.5	0.56	0.49						3.81	0.66	F86	0.57	0.59	0.66	0.35	0.12		0.24	0.65
T0202EM008_1	emd_30210	2.5	0.57	0.55	0.65	0.79	0.79	0.66	2.6	5.07	0.72	F86	0.63	0.71	0.74	0.84	0.8		0.48	0.85	0.48	0.87
T0202EM009_1	emd_30210	2.5	0.59	0.6	0.72	0.84	0.82	0.73	2.62	3.97	0.73	F86	0.71	0.74	0.75	0.85			0.57	0.8	0.82	0.87
T0202EM010_1	emd_30210	2.5	0.58	0.59	0.69	0.81	0.79	0.69	2.67	4.02	0.72	F86	0.68	0.73	0.74						0.82	0.88
T0202EM011_1	emd_30210	2.5	0.57	0.55	0.7	0.73	0.74	0.68	2.93	4.07	0.69	F86	0.56	0.64	0.69		0.52		0.34	0.82	0.48	0.87
T0202EM012_1	emd_30210	2.5	0.59	0.6	0.72	0.86	0.84	0.74	2.58	4.35	0.73	F86	0.68	0.72	0.74	0.85	0.84		0.56	0.79	0.82	0.87
T0202EM013_1	emd_30210	2.5	0.58	0.59	0.73	0.75	0.76	0.71	2.85	4.77	0.71	F86	0.59	0.67	0.72	0.32	0.4		0.01		0.8	0.87
T0202EM7bv2	emd_30210	2.5	0.59	0.6	0.77	0.83	0.82	0.77	2.68	4.56	0.72	F86	0.74	0.73	0.74	0.85	0.89		0.61	0.73	0.81	0.87
T0203EM001_1	emd_22898	2.1	0.55	0.52	0.62	0.68	0.67	0.58	2.43	4.61	0.68	PEE	0.6	0.75	0.76						0.41	0.84
T0203EM001_2	emd_22898	2.1	0.59	0.55	0.66	0.73	0.72	0.64	2.38	5.95	0.75	PEE	0.66	0.75	0.77	0.41					0.44	0.88
T0203EM001_3	emd_22898	2.1	0.59	0.55	0.66	0.73	0.72	0.64	2.34	5.24	0.76	PEE	0.63	0.74	0.77	0.45					0.44	0.88
T0203EM002_1	emd_22898	2.1	0.62	0.62	0.65	0.86	0.85	0.66	2.17	5.33	0.79	PEE	0.72	0.78	0.8	0.79					0.83	0.91
T0203EM002_2	emd_22898	2.1	0.62	0.62	0.65	0.86	0.85	0.66	2.17	5.33	0.79	PEE	0.72	0.78	0.8	0.79					0.83	0.91
T0203EM002_3	emd_22898	2.1	0.53	0.55	0.54	0.73	0.72	0.53	2.33	2.46	0.65	PEE	0.69	0.68	0.71	0.54					0.73	0.92
T0203EM003_1	emd_22898	2.1	0.61	0.59	0.74	0.84	0.82	0.73	2.19	6.43	0.8	PEE	0.73	0.81	0.81	0.82					0.45	0.91
T0203EM003_2	emd_22898	2.1	0.61	0.59	0.74	0.84	0.82	0.74	2.19	6.36	0.8	PEE	0.73	0.81	0.8	0.84					0.45	0.91
T0203EM004_1	emd_22898	2.1	0.54	0.54	0.6	0.65	0.65	0.55	2.49	2.47	0.66	PEE	0.76	0.64	0.66
T0203EM004_2	emd_22898	2.1	0.39	0.32	0.38	0.39	0.41	0.28	4.25	1.17	0.36	PEE	0.26	0.55	0.56						0.34	0.6
T0203EM005_1	emd_22898	2.1	0.62	0.62	0.64	0.75	0.75	0.63	2.82	5.29	0.8	PEE	0.74	0.8	0.81	0.84					0.82	0.9
T0203EM006_1	emd_22898	2.1	0.61	0.61	0.65	0.84	0.83	0.66	2.19	4.47	0.79	PEE	0.71	0.79	0.8	0.86					0.79	0.85
T0203EM007_1	emd_22898	2.1	0.62	0.62	0.67	0.85	0.83	0.68	2.31	5.29	0.8	PEE	0.51	0.74	0.79	0.46					0.83	0.9
T0203EM008_1	emd_22898	2.1	0.6	0.57	0.62	0.84	0.83	0.63	2.18	5.75	0.78	PEE	0.61	0.75	0.79	0.83					0.43	0.9
T0203EM009_1	emd_22898	2.1	0.61	0.61	0.66	0.86	0.85	0.68	2.17	3.75	0.78	PEE	0.71	0.78	0.79	0.86					0.81	0.89
T0203EM010_1	emd_22898	2.1	0.61	0.61	0.66	0.86	0.85	0.67	2.19	5.08	0.78	PEE	0.73	0.79	0.78	0.89					0.83	0.91
T0203EM011_1	emd_22898	2.1	0.61	0.58						6.11	0.8	PEE	0.72	0.8	0.8						0.44	0.9
T0203EM012_1	emd_22898	2.1	0.44	0.62	0.48	0.89	0.88	0.38	2.18	5.87	0.8	PEE	0.75	0.8	0.79	0.88					0.83	0.9
T0203EM014_1	emd_22898	2.1	0.43	0.58	0.42	0.82	0.82	0.31	2.3	5.6	0.79	PEE	0.67	0.75	0.76	0.86					0.47	0.89
T0203EM016_1	emd_22898	2.1	0.62	0.62	0.62	0.83	0.82	0.63	2.19	5.47	0.8	PEE	0.77	0.81	0.81	0.86					0.83	0.9
T0203EM017_1	emd_22898	2.1	0.59	0.59	0.64	0.81	0.8	0.64	2.35	4.67	0.74	PEE		0.58	0.73						0.78	0.88
T0203EM7kjr	emd_22898	2.1	0.62	0.62	0.68	0.87	0.86	0.7	2.19	5.29	0.8	PEE	0.76	0.8	0.81	0.88					0.83	0.9

## Sheet: Fit-to-Map-Correl
All Targets Combined
	TEMPy CCC	TEMPY SMOC	Phenix CCbox	PhenixCCmask	PhenixCCvol	PhenixCCpeaks	PhenixFSC(1/d)	EMRinger	Q-protein	Q-Ligand	LIVQ5	LIVQ10	Q-HOH	AtomIncl-All	Atom Incl-BB
TEMPy CCC	⏎
TEMPY SMOC	0.261071	⏎
Phenix CCbox	0.860442	0.424467	⏎
PhenixCCmask	0.342781	0.792608	0.58383	⏎
PhenixCCvol	0.413064	0.822436	0.609654	0.985164	⏎
PhenixCCpeaks	0.870654	0.318774	0.972807	0.532532	0.546819	⏎
PhenixFSC(1/d)	0.180214	0.792748	0.289734	0.788979	0.792199	0.22931	⏎
EMRinger	0.107392	0.79496	0.210315	0.590529	0.625244	0.0942429	0.705083	⏎
Q-protein	0.252623	0.9139	0.382289	0.828842	0.833551	0.320535	0.865205	0.844532	⏎
Q-Ligand	0.332285	0.412057	0.397918	0.461614	0.494347	0.378242	0.345371	0.265166	0.415046	⏎
LIVQ5	0.180809	0.646269	0.243441	0.592151	0.618728	0.20501	0.637224	0.740373	0.746622	0.576544	⏎
LIVQ10	0.229401	0.796983	0.310352	0.719477	0.738127	0.262316	0.749424	0.84435	0.891962	0.446262	0.919283	⏎
Q-HOH	0.281756	0.41527	0.30811	0.750535	0.772645	0.293377	0.294174	0.287407	0.482059	0.44182	0.547582	0.54936	⏎
AtomIncl-All	0.456408	0.622906	0.505837	0.594852	0.610232	0.482977	0.331731	0.204965	0.430885	0.447626	0.28993	0.356754	0.253916	⏎
Atom Incl-BB	0.376897	0.939193	0.552267	0.839538	0.870645	0.426825	0.82793	0.830962	0.892793	0.404057	0.578431	0.75442	0.362385	0.435383	⏎
Target 1
	TEMPy CCC	TEMPY SMOC	Phenix CCbox	PhenixCCmask	PhenixCCvol	PhenixCCpeaks	FSC(1/d)	EMRinger	Q-protein	Q-Ligand	LIVQ5	LIVQ10	Q-HOH	Q-MG	Q-NA	AtomIncl-All	Atom Incl-BB
TEMPy CCC	⏎
TEMPY SMOC	0.0975498	⏎
Phenix CCbox	0.912236	0.397818	⏎
PhenixCCmask	0.256723	0.843119	0.596263	⏎
PhenixCCvol	0.35539	0.814356	0.662887	0.986494	⏎
PhenixCCpeaks	0.941425	0.322763	0.990123	0.498565	0.568326	⏎
FSC(1/d)	0.0427291	0.87235	0.352262	0.83094	0.815856	0.271922	⏎
EMRinger	-0.0587405	0.859711	0.129535	0.613606	0.590873	0.0701819	0.699889	⏎
Q-protein	0.0725609	0.983437	0.320973	0.77855	0.750761	0.249659	0.86561	0.905783	⏎
Q-Ligand	0.30838	0.331369	0.379776	0.332778	0.393593	0.336686	0.217108	0.262265	0.281048	⏎
LIVQ5	0.0416531	0.691679	0.198564	0.536132	0.552994	0.149975	0.55501	0.843742	0.703332	0.559286	⏎
LIVQ10	0.0447434	0.813208	0.218391	0.637814	0.638945	0.16101	0.668419	0.935801	0.844534	0.394286	0.929905	⏎
Q-HOH	0.385194	0.677311	0.528454	0.810698	0.845562	0.463358	0.368906	0.45273	0.549158	0.387146	0.583994	0.612365	⏎
Q-MG	0.338154	0.601648	0.624162	0.743928	0.789274	0.529866	0.460463	0.384351	0.520234	0.37615	0.447605	0.493328	0.847175	⏎
Q-NA	0.20402	0.514288	0.47117	0.525061	0.587912	0.407556	0.471019	0.368797	0.46136	0.650837	0.61796	0.48656	0.472342	0.563042	⏎
AtomIncl-All	0.565058	0.544845	0.74416	0.646447	0.657568	0.690156	0.336123	0.272179	0.476152	0.50219	0.389543	0.380621	0.230971	0.680698	0.567387	⏎
Atom Incl-BB	0.187027	0.965374	0.530029	0.889392	0.892679	0.42499	0.876283	0.801723	0.965898	0.297844	0.525003	0.709441	0.95427	0.809522	0.656445	0.454851	⏎
Target 2
	TEMPy CCC	TEMPY SMOC	Phenix CCbox	PhenixCCmask	PhenixCCvol	PhenixCCpeaks	FSC(1/d)	EMRinger	Q-protein	Q-Ligand	LIVQ5	LIVQ10	Q-HOH	Q-MG	Q-POP	Q-ZN	AtomIncl-All	Atom Incl-BB
TEMPy CCC	⏎
TEMPY SMOC	0.87163	⏎
Phenix CCbox	0.934619	0.843706	⏎
PhenixCCmask	0.957404	0.857404	0.907627	⏎
PhenixCCvol	0.972872	0.855976	0.92401	0.995624	⏎
PhenixCCpeaks	0.956695	0.842712	0.988269	0.954264	0.967	⏎
FSC(1/d)	0.939609	0.840572	0.850651	0.980272	0.980182	0.908446	⏎
EMRinger	0.796678	0.531577	0.79952	0.832417	0.85879	0.849625	0.829078	⏎
Q-protein	0.982916	0.8693	0.915191	0.964437	0.977371	0.945891	0.967539	0.830605	⏎
Q-Ligand	0.615966	0.745583	0.631751	0.656141	0.637825	0.63142	0.643282	0.223372	0.584068	⏎
LIVQ5	0.825541	0.679838	0.740144	0.748083	0.786088	0.76912	0.756376	0.64109	0.795999	0.759084	⏎
LIVQ10	0.967996	0.850629	0.910453	0.939435	0.959795	0.937982	0.946881	0.799911	0.977053	0.667211	0.88918	⏎
Q-HOH	0.550146	0.45054	-0.0530243	0.696478	0.717675	0.214364	0.718758	0.178715	0.721571	0.826591	0.463377	0.600262	⏎
Q-MG	0.124351	0.344802	0.0110662	0.181951	0.146222	0.0587227	0.209871	-0.0726668	0.110705	0.662975	0.252582	0.169445	0.943551	⏎
Q-POP	0.164214	0.266336	0.120236	0.258716	0.217438	0.167558	0.239357	-0.0477835	0.143361	0.674581	0.276834	0.207722	0.888026	0.878559	⏎
Q-ZN	0.84904	0.782222	0.813717	0.867843	0.886156	0.849589	0.897661	0.779611	0.881378	0.535742	0.887754	0.899723	0.659479	0.313875	0.372258	⏎
AtomIncl-All	0.55707	0.761377	0.503529	0.55498	0.518048	0.497442	0.479875	0.147576	0.490497	0.637663	0.328838	0.428622	0.12438	0.266472	0.0601414	0.237974	⏎
Atom Incl-BB	0.973972	0.895067	0.91107	0.941917	0.959054	0.934855	0.942445	0.890399	0.990292	0.687638	0.808883	0.976041	0.125095	0.0918782	0.118922	0.941409	0.444404	⏎
Target 3
	TEMPy CCC	TEMPY SMOC	Phenix CCbox	PhenixCCmask	PhenixCCvol	PhenixCCpeaks	FSC(1/d)	EMRinger	Q-protein	Q-Ligand	LIVQ5	LIVQ10	Q-HOH	AtomIncl-All	Atom Incl-BB
TEMPy CCC	⏎
TEMPY SMOC	0.645557	⏎
Phenix CCbox	0.929642	0.577244	⏎
PhenixCCmask	0.563955	0.943445	0.525883	⏎
PhenixCCvol	0.544589	0.942669	0.49646	0.998731	⏎
PhenixCCpeaks	0.969283	0.590773	0.984646	0.541813	0.515161	⏎
FSC(1/d)	0.556234	0.847845	0.560648	0.91847	0.907708	0.567093	⏎
EMRinger	0.473655	0.670712	0.522945	0.740512	0.730825	0.464189	0.650224	⏎
Q-protein	0.64324	0.950815	0.612447	0.935761	0.93147	0.598262	0.858251	0.837253	⏎
Q-Ligand	0.502237	0.819671	0.493735	0.723903	0.725258	0.477481	0.751662	0.497866	0.770682	⏎
LIVQ5	0.511224	0.715553	0.503149	0.729164	0.725539	0.481887	0.670458	0.753992	0.797598	0.730864	⏎
LIVQ10	0.690165	0.883175	0.649963	0.887633	0.880415	0.647237	0.799236	0.855265	0.94726	0.684972	0.896422	⏎
Q-HOH	-0.0554852	0.606214	-0.0904821	0.674226	0.715206	-0.0763704	0.340624	0.171645	0.531969	0.675962	0.708411	0.524225	⏎
AtomIncl-All	0.348757	0.648414	0.196193	0.569349	0.584857	0.282234	0.38745	-0.00491936	0.40365	0.473178	0.23723	0.380663	0.293674	⏎
Atom Incl-BB	0.608181	0.910358	0.582014	0.88374	0.872419	0.579969	0.869237	0.70071	0.906718	0.853866	0.672509	0.863051	0.110751	0.41229	⏎

## Sheet: Model-only
Model	MP score	MP clash	MP rota out	MP rama out	MP rama fav	MP Cablam conf	MP Cablam ca	MP RNAsuite	MP RNApucker	MP HOH clash	Ligand	MOG angl rmsz	MOG bond rmsz	MOG angl out	MOG bond out	MOG chiral out	MOG ring out	MOG torsion out	MP clash ligand	MOG complete	MOG composite	Strain MM	Strain NNP	Pharmacore PH4	DNATCOconfal	DNATCO%	DNATCOrmsd
T0201EM001_1	1.55	2.81	0.8	1.28	92.15	4	0.98			1.25	PTQ	1.7	2.08	5	8	0	0	4	0	1	0.17	2.6	3.9	53.3
T0201EM001_2	1.35	3.05	0.11	0	96.27	2.3	0.69			1.03	PTQ	1.43	1.29	5	2	0	0	4	2	1	0.34	6.3	8.2	58.87
T0201EM001_3	1.35	3.62	0.11	0.1	96.76	2.3	0.79			1.08	PTQ	1.6	1.8	7	4	0	0	3	2	1	0.23	2.4	4.1	56
T0201EM002_1	3.03	31.67	3.4	4.25	86.05	6.8	1.6			40.15	PTQ	2.75	2.1	9.5	7.25	0	0	6	1.25	1	0.08	18.3	11.3	71.74
T0201EM002_2	1.67	6.32	0.34	0	95.44	1.9	0.76			20.1	PTQ	2.49	2.38	9.25	6	0	0	4	2	1	0.08	11.7	10.6	73.19
T0201EM002_3	3	58.85	0.29	8.68	78.37	10.2	1.27			52.49	PTQ	2.24	2.02	8.25	3.25	0	0	2.5	2.75	1	0.12	18.8	14.1	61.06
T0201EM003_1	1.6	10.6	0	0	97.74	1.3	0.59			0.21	PTQ	1.82	2.77	4	6	0	0	3	0	1	0.1	8.7	7	57.98
T0201EM003_2	1.58	11.72	0	0	98.04	1.2	0.59			0.6	PTQ	1.9	2.82	4	6	0	0	3	0	1	0.09	8.1	10.7	57.19
T0201EM003_3	1.62	11.72	0	0.1	97.84	1.2	0.59			0.73	PTQ	1.84	1.48	6	5	0	0	4	0	1	0.24	3.5	3.6	44.52
T0201EM004_1	3.61	260.68	0.2	5.64	79.46	5.2	0.72				PTQ	1.67	2.39	4	4	0	0	5	13.5	1	0.14	8.8	9.5	52.59
T0201EM004_2	3.17	109.51	0.63	3.43	84.31	3.4	0.99				PTQ	1.67	2.39	4	4.25	0	0	5	0	1	0.14	8.9	8.9	50.39
T0201EM005_1	1.3	3.86	0	0	97.3	2.4	0.79			2.12	PTQ	1.36	1.83	2	5.75	0	0	6	4	1	0.26	9.4	10.2	53.37
T0201EM005_2	1.29	3.67	0	0	97.3	2.4	0.79			2.12	PTQ	1.34	1.32	2	3.75	0	0	5.25	1	1	0.36	6	6.9	66.59
T0201EM006_1	1.72	5.78	1.35	0.1	95.61	2.9	0.79			2.49	PTQ	1.14	1.05	3	0	0	0	5	0	1	0.45	4.9	3.3	65.15
T0201EM007_1	1.38	1.56	1.17	0.22	93.52	2.3	0.71			0	PTQ	1.59	1.79	3.75	6	0	0	1.75	0.75	0.99	0.23	4.4	4.2	57.7
T0201EM008_1	0.7	0.56	1.03	0.2	98.33	1.9	0.59			0.53	PTQ	0.73	0.23	1	0	0	0	3	0	1	0.75	6.1	2.3	78.37
T0201EM009_1	1.4	5.88	0.91	0	97.64	2	0.79			5.21	PTQ	1.27	1.32	2	2	0	0	2	0.5	1	0.37	5.6	5.3	63.72
T0201EM010_1	1.27	2.7	1.38	0	97.45	1.4	0.69			3.05	PTQ	0.54	0.18	0	0	0	0	5	0.5	1	0.86	8.1	8.3	48.22
T0201EM011_1	2.37	16.83	2.25	0.22	94.55	2.4	0.79				PTQ	1.45	1.47	3.5	3	0	0	5	0	1	0.31	6.6	7.8	61.59
T0201EM012_1	1.25	3.17	0.57	0.1	97.25	1.8	0.69			1.64	PTQ	1.06	0.48	2	0	0	0	4	0	1	0.59	7.4	6.1	74.26
T0201EM013_1	1.27	3.37	0	0.1	97.25	2.2	0.79			2.73	PTQ	1.58	1.61	4	2	0	0	4	2	1	0.26	7.7	8.4	51.67
T0201EM014_1	1.07	2.8	0.11	0	98.23	1.8	0.79			16.52	PTQ	0.31	0.13	0	0	0	0	3	1	1	0.94	4.2	3.8	78.72
T0201EM015_1	2.45	15.85	3.42	0.76	95.09	3	1.11			0.83	PTQ	0.91	0.84	1.25	0.75	0	0	2.5	0	1	0.55	5.3	4.4	81.04
T0201EM6cvm	1.28	3.63	0	0	97.3	2.4	0.79			6.44	PTQ	1.67	2.39	4	4	0	0	5	1.5	1	0.14	8.92	7.92	49.59
T0202EM001_1	0.59	0.24	0.45	0	98	1.3	0.51	0	92	0	F86	1.3	1.13	3	1	0	0	0	0	1	0.4	6.4		3.56	71	93.9	0.26
T0202EM001_2	0.93	0.95	0.94	0.1	97.2	1.3	0.41		88		F86	1.27	1.22	3	1	0	0	2	0	1	0.39	5.5		0	65	87.8	0.29
T0202EM002_1	2.55	19.15	2.45	2.64	92.37	3.5	0.96			46.23	F86	2.29	5.86	6	8	0	0	2	7	1	0.01			0
T0202EM002_2	2.27	11.58	3.5	0.2	96	1.3	0.51	0	0	42.47	F86	1.85	5.37	7	9	0	0	2	3	1	0.02	8		6.13	59	78.3	0.27
T0202EM003_1	0.85	1.3	0	0.1	99.2	0.9	0.41	0	0	0	F86	2.24	1.31	7	3	0	0	0	1	1	0.2	4.7		6.5	61	81.8	0.23
T0202EM003_2	2.27	62.3	0.66	0.23	99.2	0.8	0.23		0	0.28	F86	2.22	1.29	6	2	0	0	0	1	1	0.21	4.9		7.06	62	83.3	0.23
T0202EM004_1	3.05	101.77	0.22	3.5	88.89	5.5	0.51	0	0		F86	1.61	1.25	4	3	0	0	2	4	1	0.32	6.7		6.38	64	86.4	0.23
T0202EM004_2	2.13	22.72	0.11	0.6	95.9	3.5	1.13	0	4		F86	1.6	1.25	4	3	0	0	2	19	1	0.32	6.7		5.44	34	27.8	0.38
T0202EM005_1	1.35	6.31	0	0	98.7	1	0.41	0	0	1.44	F86	1.84	3.65	4	8	0	0	1	4	1	0.05	7		5.63	64	86.4	0.23
T0202EM006_1	1.69	2.97	3.14	0	96.5	2.7	0.61		0	1.88	F86	1.19	0.76	3	1	0	0	1	0	1	0.5	7.3		5.69	73	95.2	0.2
T0202EM007_1	1.62	2.54	1.79	0.6	94.33	2.1	1.4		0	0	F86	1.85	1.63	6	3	0	0	1	1	1	0.21	2.8		5.63	49	57.3	0.29
T0202EM008_1	0.61	0.12	0.45	0	97.7	1.2	0.41	0	0	0	F86	1.2	0.54	2	0	0	0	0	0	1	0.55	6.8		5.06	70	93.2	0.23
T0202EM009_1	1.63	5.87	2.58	0	98.6	1.1	0.41	0	0	7.83	F86	1.14	0.73	3	1	0	0	3	0	1	0.52	7.2		5.06	72	94.6	0.19
T0202EM010_1	1.47	2.45	3.82	0	98.04	1	0.42	0	0		F86	1.27	0.63	3	0	0	0	3	0	1	0.51	7.9		7.06	77	97.2	0.18
T0202EM011_1	1.74	2.49	2.58	0.3	94.09	1.1	0.51	0	0		F86	2.16	1.96	9	5	0	0	2	0	1	0.13	3.5		5.19	63	84.8	0.22
T0202EM012_1	1.76	4.35	3.5	0.2	97.3	1.6	0.51	0	0	0	F86	1.25	1.18	1	2	0	0	3	0	1	0.4	7		6.56	65	87.8	0.24
T0202EM013_1	0.75	0.23	1.34	0	97.7	1.2	0.3	0	0	6.67	F86	2.01	1.89	8	6	0	0	5	0	1	0.16	8		4.31	64	86.4	0.24
T0202EM7bv2	1.3	5.48	0	0	98.7	1	0.41	0	0	0	F86	1.61	1.25	4	3	0	0	2	0	0.96	0.32	10.02		5.62	64	86.4	0.23
T0203EM001_1	1.64	2.91	1.67	2.43	94.25	3.2	1.13				PEE	0.9	0.91	1	1	0	0	11	0.5	0.45	0.53	14		5.15
T0203EM001_2	1.16	2.7	0.74	0	97.48	0.7	0			5.47	PEE	0.86	1.11	1	2	0	0	8.5	0	0.47	0.5	6.4		11.95
T0203EM001_3	1.1	1.62	1.48	0	97.71	0.7	0			1.69	PEE	1.16	1.21	1.5	3	0	0	7	0	0.47	0.41	14.8		11.3
T0203EM002_1	1.98	10.53	2.46	0	97.25	0.5	0			28.28	PEE	1.08	1.09	2.5	2.5	0	0	24	22.5	0.71	0.45	27.8		5.1
T0203EM002_2	1.98	10.53	2.46	0	97.25	0.5	0			28.28	PEE	1.25	1.1	3.5	3	0	0	24	4.5	0.71	0.41	19.6		0
T0203EM002_3	2.87	26.74	2.93	3.96	87.87	3	0.76			29.03	PEE	1.05	1.1	3	2.5	0	0	22.5	4	0.71	0.46	29
T0203EM003_1	0.76	0.82	0	0	99.08	0	0			0	PEE	1.27	1.38	4	1	0	0	0	0	0.45	0.36	15.3		11.45
T0203EM003_2	0.68	0.54	0	0	99.08	0	0			0	PEE	1.22	1.39	4	1	0	0	0	0	0.45	0.37	7.1		11.45
T0203EM004_1	2.73	72.87	0	1.38	94.04	1.9	0				PEE	1.23	1.35	3	1	0	0	13.5	2	0.45	0.37	9.5		14.05
T0203EM004_2	1.84	9.51	0	0.46	95.18	1	0.24				PEE	0.96	0.92	1	1	0	0	13.5	0.5	1	0.52	14.8		14.1
T0203EM005_1	1.6	12.17	0.25	0	98.17	0.5	0			1.25	PEE	1.14	6.21	5	28	0	0	37	3	1	0.02	10.1		7.5
T0203EM006_1	1.37	5.75	1.18	0	98.25	0.9	0			0	PEE	0.89	1.1	1	2	0	0	27	2	0.86	0.49	19.6		11.65
T0203EM007_1	1.69	15.46	0.25	0	98.17	0.5	0			68.85	PEE	0.97	1.1	1.5	1	0	0	9	3	0.45	0.47	15.9		8.4
T0203EM008_1	0.5	0	0.25	0	99.08	0	0			0	PEE	0.96	0.39	2	0	0	0	5	0	0.73	0.64	16.2		7.1
T0203EM009_1	1.63	9.26	0.99	0	97.25	0.5	0			2.2	PEE	0.9	1.27	4	7	0	0	22	2.5	1	0.45	15.9		5.4
T0203EM010_1	1.2	2.77	1.51	0	99.06	0	0			6.67	PEE	0.54	0.38	0	0	0	0	3	0	0.47	0.77	12.2		14.3
T0203EM011_1	1.09	1.89	0.52	0.45	97.27	0.2	0.46				PEE	0.76	0.62	0	0	0	0	5	0	0.45	0.64	16.5		11.1
T0203EM012_1	1.19	4.05	0	0	98.62	0.5	0			1.72	PEE	0.8	0.47	2	0	0	0	11	1	0.51	0.67	6.8		12.6
T0203EM014_1	0.91	1.59	0	0	99.08	0.5	0			15.52	PEE	0.83	2.07	2	12	0	0	19	0	1	0.31	21.6		9.65
T0203EM016_1	1.5	6.65	1.48	0	99.08	0.5	0			6.08	PEE	1.16	1.26	2	3	0	0	7	0	0.45	0.4	17		13.75
T0203EM017_1	0.67	0	0.49	0	97.02	0.5	0															0.2		4.7
T0203EM7kjr	1.42	7.6	0.25	0	98.17	0.5	0			4.92	PEE	1.23	1.35	3	1	0	0	13.5	0	0.45	0.37	7.79		13.5

## Sheet: Model-only-Correl
Scores from All Targets
	MP score	MP clash	MP rota out	MP rama out	MP rama fav	MP Cablam conf	MP Cablam ca	MP HOH clash	MOG angl rmsz	MOG bond rmsz	MOG angl out	MOG bond out	MOG torsion out	MP clash ligand	MOG complete	MOG composite	Strain MM	Pharmacore PH4
MP score	⏎
MP clash	0.709232	⏎
MP rota out	0.314457	-0.106452	⏎
MP rama out	0.729152	0.660544	0.0808948	⏎
MP rama fav	-0.78831	-0.723695	-0.125411	-0.941487	⏎
MP Cablam conf	0.663033	0.482504	0.0991194	0.860087	-0.855522	⏎
MP Cablam ca	0.419452	0.154391	0.196845	0.479251	-0.545828	0.745454	⏎
MP HOH clash	0.60531	0.485664	0.311116	0.56593	-0.540019	0.412126	0.151426	⏎
MOG angl rmsz	0.372105	0.220003	0.026785	0.342453	-0.384657	0.438437	0.438009	0.227856	⏎
MOG bond rmsz	0.297195	0.1457	0.0204458	0.169983	-0.197569	0.146068	0.122675	0.291489	0.524006	⏎
MOG angl out	0.303028	0.138464	0.0511673	0.307231	-0.353221	0.375401	0.335894	0.270975	0.895971	0.512067	⏎
MOG bond out	0.143055	0.0388154	-0.0602942	0.0498032	-0.0803731	0.047603	-0.00557567	0.0938927	0.316681	0.812595	0.407573	⏎
MOG torsion out	0.123115	-0.0135487	0.0481422	-0.0162124	0.0338946	-0.201249	-0.41583	0.152605	-0.341857	0.150234	-0.178369	0.43573	⏎
MP clash ligand	0.386095	0.368875	0.0249504	0.226657	-0.249381	0.193558	0.0581871	0.412805	0.0986667	0.169654	0.0762013	0.108081	0.252838	⏎
MOG complete	0.16095	0.0945209	0.0751871	0.0829925	-0.196424	0.364417	0.536315	-0.123021	0.417387	0.265012	0.38087	0.291888	-0.224394	0.0388303	⏎
MOG composite	-0.371306	-0.252161	0.0656521	-0.273754	0.341399	-0.317209	-0.268851	-0.187544	-0.858806	-0.787371	-0.782733	-0.628357	0.0605177	-0.152588	-0.350625	⏎
Strain MM	0.212892	0.0316544	0.174774	0.279491	-0.16586	0.0137604	-0.242553	0.529342	-0.1988	-0.0508047	-0.149999	0.0536982	0.6195	0.309891	-0.392623	0.112348	⏎
Pharmacore PH4	0.183127	0.118043	-0.129824	0.198794	-0.300454	0.448221	0.578626	-0.0498747	0.0968448	-0.0641342	0.0586364	-0.0424193	-0.22969	-0.128841	0.368658	-0.0135133	-0.222798	⏎
Target 1
	MP score	MP clash	MP rota out	MP rama out	MP rama fav	MP Cablam conf	MP Cablam ca	MP HOH clash	MOG angl rmsz	MOG bond rmsz	MOG angl out	MOG bond out	MOG torsion out	MP clash ligand	MOG complete	MOG composite	Strain MM	Strain NNP	Pharmacore PH4
MP score	⏎
MP clash	0.768537	⏎
MP rota out	0.364634	-0.0560204	⏎
MP rama out	0.812616	0.670214	0.118462	⏎
MP rama fav	-0.888756	-0.770274	-0.161688	-0.958326	⏎
MP Cablam conf	0.700928	0.437838	0.237175	0.93549	-0.869347	⏎
MP Cablam ca	0.602359	0.126064	0.592364	0.635936	-0.605277	0.78418	⏎
MP HOH clash	0.743953	0.858556	0.221444	0.886305	-0.862802	0.863269	0.758402	⏎
MOG angl rmsz	0.480933	0.196396	-0.0121962	0.44663	-0.468241	0.470731	0.426788	0.509533	⏎
MOG bond rmsz	0.435774	0.334622	-0.246126	0.315384	-0.388214	0.254037	0.147972	0.187187	0.819952	⏎
MOG angl out	0.420485	0.125138	-0.00158155	0.454518	-0.457353	0.511916	0.459054	0.584361	0.919937	0.635204	⏎
MOG bond out	0.255461	0.104962	-0.106447	0.180196	-0.253636	0.192715	0.225065	0.158443	0.782594	0.82612	0.628298	⏎
MOG torsion out	0.239645	0.219252	0.0742991	0.064209	-0.144832	0.0794434	0.193379	0.0596345	0.147762	0.101444	0.071848	0.141336	⏎
MP clash ligand	0.46832	0.824787	-0.235034	0.48911	-0.545805	0.352129	-0.00167721	0.390803	0.161079	0.270472	0.131889	0.112833	0.24221	⏎
MOG complete	0.107498	0.0863799	-0.0881959	0.0796917	0.0222877	0.0593866	0.10068	0.125823	-0.0330215	-0.0534784	0.0153027	-0.216486	0.386398	0.0533804	⏎
MOG composite	-0.456368	-0.280969	0.168355	-0.352204	0.420404	-0.342454	-0.241834	-0.238511	-0.906774	-0.949473	-0.755821	-0.8193	-0.126419	-0.240331	0.081621	⏎
Strain MM	0.537458	0.251768	0.174454	0.688988	-0.598353	0.706255	0.622014	0.845866	0.595403	0.353478	0.525007	0.236544	0.262999	0.216028	0.16809	-0.375369	⏎
Strain NNP	0.513819	0.33138	-0.0847205	0.571859	-0.532091	0.532767	0.391965	0.639305	0.594525	0.527202	0.475077	0.341281	0.33537	0.355492	0.202872	-0.507425	0.850895	⏎
Pharmacore PH4	-0.0866207	-0.220801	0.440719	-0.0630475	0.124322	0.0471442	0.237123	0.23421	-0.238686	-0.459462	-0.14736	-0.383421	-0.260752	-0.21495	0.0694048	0.440129	0.0859999	-0.204451	⏎
Target 2
	MP score	MP clash	MP rota out	MP rama out	MP rama fav	MP Cablam conf	MP Cablam ca	MP RNApucker	MP HOH clash	MOG angl rmsz	MOG bond rmsz	MOG angl out	MOG bond out	MOG torsion out	MP clash ligand	MOG complete	MOG composite	Strain MM	Pharmacore PH4	DNATCOconfal	DNATCO%	DNATCOrmsd
MP score	⏎
MP clash	0.729111	⏎
MP rota out	0.244929	-0.274915	⏎
MP rama out	0.718215	0.73344	-0.0933578	⏎
MP rama fav	-0.681905	-0.567166	-0.102285	-0.88552	⏎
MP Cablam conf	0.677869	0.654001	-0.0864726	0.870289	-0.854855	⏎
MP Cablam ca	0.308296	-0.0504832	0.0737714	0.319821	-0.471374	0.484819	⏎
MP RNApucker	-0.428909	-0.179762	-0.217499	-0.129917	0.112427	-0.106513	-0.0786989	⏎
MP HOH clash	0.627608	0.137839	0.50106	0.695058	-0.669628	0.506311	0.245169	-0.131411	⏎
MOG angl rmsz	0.273808	0.207956	-0.191217	0.267082	-0.187181	-0.00157357	0.11409	-0.329199	0.372951	⏎
MOG bond rmsz	0.390011	0.00582963	0.200189	0.333595	-0.301489	0.125114	0.208687	-0.132738	0.888222	0.557062	⏎
MOG angl out	0.142082	0.0402117	-0.0114068	0.094887	-0.192202	-0.0965736	0.0740152	-0.259598	0.403283	0.866394	0.446546	⏎
MOG bond out	0.332567	0.0300326	0.0541511	0.258325	-0.269466	0.0903258	0.134387	-0.287717	0.713902	0.67355	0.905286	0.619412	⏎
MOG torsion out	0.1123	-0.0947625	0.432771	0.0590311	-0.129022	0.0718768	-0.0749487	-0.200347	0.249126	-0.0877627	0.0799953	0.102424	0.212861	⏎
MP clash ligand	0.440336	0.258134	-0.256278	0.345743	-0.298712	0.541676	0.552415	-0.127644	0.761141	0.175402	0.259983	0.0320534	0.275679	0.0203035	⏎
MOG complete	0.103398	0.0809402	0.274185	0.120311	-0.196571	0.156329	0.123594	0.0935176	0.151753	0.0312226	0.0934672	0.0693251	0.0247279	-0.0525269	0.11967	⏎
MOG composite	-0.318596	-0.110465	0.0806688	-0.261874	0.24728	-0.0308646	-0.174934	0.202493	-0.583943	-0.871478	-0.822878	-0.762799	-0.92183	-0.0305166	-0.238268	-0.0427184	⏎
Strain MM	-0.0428422	-0.0539807	0.0646293	-0.10629	0.247134	-0.00598801	-0.398912	-0.113079	0.285122	-0.421931	0.0828651	-0.383987	0.0700118	0.412564	0.031778	-0.513041	0.239482	⏎
Pharmacore PH4	0.149239	0.222871	0.0640763	-0.219289	0.191845	-0.122975	-0.17214	-0.803827	-0.565419	-0.0218922	-0.350659	-0.00324757	-0.160496	-0.0973445	-0.0807328	-0.0698665	0.142589	0.0869251	⏎
DNATCOconfal	-0.319269	-0.150046	0.329064	-0.189054	0.251701	-0.337845	-0.70623	0.155255	-0.184075	-0.412078	-0.238331	-0.31163	-0.333361	0.0408642	-0.800835	-0.0168982	0.441605	0.30463	-0.0497719	⏎
DNATCO%	-0.308215	-0.104309	0.258256	-0.154455	0.233044	-0.362657	-0.776452	0.15316	-0.14698	-0.29102	-0.143547	-0.220718	-0.219049	0.0267661	-0.850639	-0.0542074	0.306185	0.272716	-0.0728133	0.97786	⏎
DNATCOrmsd	0.0955517	0.0248332	-0.3537	0.0968206	-0.182068	0.306206	0.636587	0.278017	0.271988	0.113916	0.188985	0.06516	0.179956	-0.0717999	0.754516	0.0752036	-0.249713	-0.202491	-0.320414	-0.874556	-0.867985	⏎
Target 3
	MP score	MP clash	MP rota out	MP rama out	MP rama fav	MP Cablam conf	MP Cablam ca	MP HOH clash	MOG angl rmsz	MOG bond rmsz	MOG angl out	MOG bond out	MOG torsion out	MP clash ligand	MOG complete	MOG composite	Strain MM	Pharmacore PH4
MP score	⏎
MP clash	0.75953	⏎
MP rota out	0.489564	0.0071955	⏎
MP rama out	0.632396	0.426812	0.444682	⏎
MP rama fav	-0.753422	-0.521901	-0.469189	-0.931255	⏎
MP Cablam conf	0.669659	0.460131	0.416146	0.909132	-0.861135	⏎
MP Cablam ca	0.335358	0.0262035	0.3763	0.8276	-0.688442	0.800932	⏎
MP HOH clash	0.537866	0.615785	0.285132	0.246373	-0.308614	0.281979	0.246373	⏎
MOG angl rmsz	0.221476	0.312469	0.0131076	0.0202984	-0.0860488	0.0439123	-0.183137	0.0101663	⏎
MOG bond rmsz	0.0790916	0.0892405	-0.182918	-0.098378	0.0797612	-0.0431611	-0.148338	-0.116981	0.307024	⏎
MOG angl out	0.156571	0.226546	-0.0806822	-0.0186413	-0.0263101	-0.0714011	-0.259904	-0.128994	0.710182	0.579888	⏎
MOG bond out	0.0408099	-0.0026844	-0.115289	-0.123475	0.102905	-0.0682707	-0.1491	-0.120837	0.1205	0.952358	0.505728	⏎
MOG torsion out	0.518906	0.229295	0.321475	0.133114	-0.27322	0.259559	0.00389985	0.132847	0.106248	0.594003	0.377722	0.664369	⏎
MP clash ligand	0.394171	0.141785	0.497682	0.0125702	-0.139518	0.0355408	-0.0642662	0.383203	0.14825	0.0438182	0.168665	0.0575785	0.444199	⏎
MOG complete	0.128011	-0.0588472	0.00654104	-0.0636282	-0.0737203	-0.0162893	-0.10365	-0.080928	-0.116499	0.427477	0.262445	0.591596	0.722334	0.186178	⏎
MOG composite	-0.172507	-0.214345	0.132822	0.0563754	-0.00739863	-0.0322128	0.197062	0.0218005	-0.67708	-0.846418	-0.737989	-0.756817	-0.51444	-0.0996739	-0.325709	⏎
Strain MM	0.440076	0.0697127	0.621485	0.356707	-0.346382	0.255586	0.272773	0.438696	-0.00161958	-0.126151	-0.0394595	-0.0051583	0.378659	0.55621	0.379915	0.00718672	⏎
Pharmacore PH4	-0.0565333	0.17212	-0.477391	-0.0532275	0.136228	-0.100173	-0.167842	-0.392122	-0.14937	-0.148657	-0.332483	-0.246669	-0.463527	-0.447642	-0.327937	0.178422	-0.255703	⏎

## Sheet: Model-vs-Reference
Target_Chain	Model_Chain	LDDT	CAD	RMSD	GDT_TS	GDT_HA	GDC_ALL	GDC_SC		Model	LDDTavg	CADavg	RMSDavg	GDT_TSavg	GDT_HAavg	GDC_ALLavg	GDC_SCavg	MP Cablam conf	MP Cablam ca
T0201_A	T0201EM001_2_A	0.98	0.95	0.09	100	100	99.99	99.98		T0201EM001_2	0.98	0.95	0.09	100	100	99.99	99.98	2.3	0.69
T0201_A	T0201EM001_3_A	0.98	0.95	0.09	100	100	99.98	99.98		T0201EM001_3	0.98	0.95	0.09	100	100	99.98	99.98	2.3	0.79
T0201_A	T0201EM003_1_A	0.98	0.92	0.15	100	99.93	97.56	90.84		T0201EM003_1	0.98	0.92	0.15	100	99.93	97.56	90.84	1.3	0.59
T0201_A	T0201EM003_2_A	0.98	0.92	0.14	100	99.93	97.57	91		T0201EM003_2	0.98	0.92	0.14	100	99.93	97.57	91	1.2	0.59
T0201_A	T0201EM003_3_A	0.98	0.92	0.15	100	99.95	97.64	91.06		T0201EM003_3	0.98	0.92	0.15	100	99.95	97.64	91.06	1.2	0.59
T0201_A	T0201EM007_1_A			3.82	51.64	27.01	7.33	0.04		T0201EM007_1			3.82	51.64	27.01	7.33	0.04	2.3	0.71
T0201_A	T0201EM008_1_A	0.98	0.9	0.2	99.98	99.48	97.86	94.08		T0201EM008_1	0.98	0.9	0.2	99.98	99.48	97.86	94.08	1.9	0.59
T0201_A	T0201EM009_1_A	0.99	0.93	0.14	100	99.93	98.14	91.97		T0201EM009_1	0.99	0.93	0.14	100	99.93	98.14	91.97	2	0.79
T0201_A	T0201EM012_1_A	0.98	0.92	0.16	100	99.75	96.67	87.59		T0201EM012_1	0.98	0.92	0.16	100	99.75	96.67	87.59	1.8	0.69
T0201_A	T0201EM013_1_A	0.98	0.95	0.09	100	100	99.98	99.94		T0201EM013_1	0.98	0.95	0.09	100	100	99.98	99.94	2.2	0.79
T0201_A	T0201EM015_1_A	0.93	0.88	0.79	98.56	97.06	92.17	80.7		T0201EM015_1	0.93	0.88	0.79	98.56	97.06	92.17	80.7	3	1.11
T0202_A	T0202EM001_1_A	0.99	0.91	0.17	100	100	98.22	93.53		T0202EM001_1	0.989394	0.911717	0.169394	100	100	98.1004	93.5556	1.3	0.51
T0202_B	T0202EM001_1_B	0.99	0.92	0.17	100	100	97.52	93.7		T0202EM001_2	0.93899	0.861818	0.381818	100	96.529	92.8151	84.2568	1.3	0.41
T0202_C	T0202EM001_1_C	0.98	0.92	0.16	100	100	97.53	93.64		T0202EM003_1	0.160808	0.15	24.6371	20.2784	19.0693	16.332	13.4202	0.9	0.41
T0202_A	T0202EM001_2_A	0.94	0.86	0.39	100	96.28	92.85	84.3		T0202EM003_2	0.843939	0.879394	0.0236364	88.5665	87.9028	83.5313	73.224	0.8	0.23
T0202_B	T0202EM001_2_B	0.92	0.86	0.36	100	96.71	91.93	82.94		T0202EM008_1	0.977172	0.888283	0.260505	100	99.3605	96.5503	90.7838	1.2	0.41
T0202_C	T0202EM001_2_C	0.96	0.89	0.31	100	99.6	93.96	86.08		T0202EM009_1	0.986566	0.924848	0.185051	100	99.5095	97.4388	92.7255	1.1	0.41
T0202_A	T0202EM003_1_A			29.68	3.78	2.67	0.75	0.65		T0202EM012_1	0.988889	0.948889	0.16798	99.9503	99.5061	98.4342	97.2462	1.6	0.51
T0202_B	T0202EM003_1_B	0.94	0.87	0.27	100	99.34	92.11	76.8		T0202EM013_1	0.990606	0.940606	0.118788	100	99.9503	98.7487	96.5138	1.2	0.3
T0202_C	T0202EM003_1_C	0.93	0.88	0.39	99.6	96.03	90.36	71.75		T0203EM001_2	0.965752	0.897168	0.271327	100	99.2188	95.4173	86.3948	0.7	0
T0202_A	T0202EM003_2_A	0.95	0.89		99.64	99.1	94.87	83.56		T0203EM001_3	0.967168	0.9	0.275752	99.8884	99.1042	95.6626	87.6139	0.7	0
T0202_B	T0202EM003_2_B	0.11	0.8							T0203EM003_1	0.131681	0.12177	6.85398	75.4238	74.2018	71.2245	85.4673	0	0
T0202_C	T0202EM003_2_C	0.74	0.88	0.39	99.6	96.03	81.71	66.21		T0203EM003_2	0.131681	0.12177	6.86115	75.4238	74.2018	71.2003	85.3385	0	0
T0202_A	T0202EM008_1_A	0.98	0.89	0.25	100	99.52	96.92	91.03		T0203EM007_1	1	1	0	100	100	100	100	0.5	0
T0202_B	T0202EM008_1_B	0.96	0.88	0.29	100	98.69	94.7	89		T0203EM008_1	0.984336	0.905752	0.182832	100	99.7768	97.5382	92.8732	0	0
T0202_C	T0202EM008_1_C	0.97	0.88	0.35	100	98.41	94.89	90.69		T0203EM009_1	0.981416	0.94	0.204336	100	99.442	97.849	94.4255	0.5	0
T0202_A	T0202EM009_1_A	0.99	0.93	0.17	100	99.7	97.92	93.61		T0203EM012_1	0.987168	0.945752	0.10708	99.5536	99.5536	98.7295	97.8546	0.5	0
T0202_B	T0202EM009_1_B	0.97	0.9	0.24	100	99.12	95.52	89.02		T0203EM016_1	0.981504	0.947257	0.128407	100	99.8884	97.4942	92.3732	0.5	0
T0202_C	T0202EM009_1_C	0.97	0.9	0.29	100	97.62	94.38	87.43		T0203EM017_1	0.965752	0.888584	0.297168	100	98.9926	95.7151	88.7935	0.5	0
T0202_A	T0202EM012_1_A	0.99	0.95	0.16	99.94	99.55	98.74	97.67
T0202_B	T0202EM012_1_B	0.98	0.94	0.21	100	99.34	96.55	94.81		table above used to calculate cc rows between model-vs-reference scores (residue weighted average for multi-chain models) and CaBlam scores
T0202_C	T0202EM012_1_C	0.99	0.95	0.2	100	99.21	97.71	95.92
T0202_A	T0202EM013_1_A	0.99	0.94	0.12	100	99.94	98.82	96.23
T0202_B	T0202EM013_1_B	0.99	0.94	0.12	100	100	98.32	97.41
T0202_C	T0202EM013_1_C	1	0.95	0.1	100	100	98.56	98.75
T0203_A	T0203EM001_2_A	0.97	0.9	0.26	100	99.09	95.92	88.37
T0203_C	T0203EM001_2_C	0.94	0.88	0.34	100	100	92.37	74.42
T0203_A	T0203EM001_3_A	0.97	0.9	0.28	99.87	99.09	96.11	89.49
T0203_C	T0203EM001_3_C	0.95	0.9	0.25	100	99.19	92.95	76.24
T0203_A	T0203EM003_1_A			7.94	71.37	70.08	68.05	88.2
T0203_C	T0203EM003_1_C	0.93	0.86	0.27	100	99.19	90.47	68.9
T0203_A	T0203EM003_2_A			7.95	71.37	70.08	68.03	88.05
T0203_C	T0203EM003_2_C	0.93	0.86	0.26	100	99.19	90.42	68.9
T0203_A	T0203EM007_1_A	1	1	0	100	100	100	100
T0203_C	T0203EM007_1_C	1	1	0	100	100	100	100
T0203_A	T0203EM008_1_A	0.99	0.91	0.18	100	99.74	98.14	94.19
T0203_C	T0203EM008_1_C	0.95	0.88	0.2	100	100	93.89	84.89
T0203_A	T0203EM009_1_A	0.98	0.94	0.21	100	99.35	97.74	94.56
T0203_C	T0203EM009_1_C	0.99	0.94	0.17	100	100	98.51	93.61
T0203_A	T0203EM012_1_A	0.99	0.95	0.1	99.48	99.48	98.99	98.69
T0203_C	T0203EM012_1_C	0.97	0.92	0.15	100	100	97.15	92.79
T0203_A	T0203EM016_1_A	0.99	0.96	0.11	100	99.87	98.77	96.09
T0203_C	T0203EM016_1_C	0.93	0.87	0.24	100	100	89.76	69.84
T0203_A	T0203EM017_1_A	0.97	0.89	0.3	100	98.96	95.97	89.83
T0203_C	T0203EM017_1_C	0.94	0.88	0.28	100	99.19	94.17	82.51

## Sheet: Model-vs-Ref-Correl
All Targets
	LDDT	CAD	RMSD	GDT_TS	GDT_HA	GDC_ALL	GDC_SC	MP Cablam conf	MP Cablam ca
LDDT	⏎
CAD	0.561956	⏎
RMSD	-0.56084	-0.740142	⏎
GDT_TS	0.328096	0.154448	-0.946074	⏎
GDT_HA	0.660443	0.531768	-0.875555	0.983373	⏎
GDC_ALL	0.910227	0.781056	-0.807482	0.944019	0.98268	⏎
GDC_SC	0.7691	0.808845	-0.655458	0.787429	0.843869	0.914491	⏎
MP Cablam conf	0.39395	0.395367	-0.176687	0.08268	0.0157035	0	-0.109544	⏎
MP Cablam ca	0.252101	0.247125	-0.0671265	0.0113541	0	0	-0.126338	0.939817	⏎
Target 1
	LDDT	CAD	RMSD	GDT_TS	GDT_HA	GDC_ALL	GDC_SC	MP Cablam conf	MP Cablam ca
LDDT	⏎
CAD	0.671668	⏎
RMSD	-0.965653	-0.793313	⏎
GDT_TS	0.981852	0.687036	-0.988527	⏎
GDT_HA	0.969432	0.771776	-0.989971	0.999937	⏎
GDC_ALL	0.831593	0.906585	-0.993693	0.998403	0.998827	⏎
GDC_SC	0.651343	0.874615	-0.991219	0.982643	0.983958	0.991409	⏎
MP Cablam conf	-0.62431	-0.0919069	0.304533	-0.224629	-0.230038	-0.225995	-0.20947	⏎
MP Cablam ca	-0.779844	-0.274299	0.115097	0	0	0	-0.0517918	0.853639	⏎
Target 2
	LDDT	CAD	RMSD	GDT_TS	GDT_HA	GDC_ALL	GDC_SC	MP Cablam conf	MP Cablam ca
LDDT	⏎
CAD	0.692965	⏎
RMSD	-0.652755	-0.87621	⏎
GDT_TS	0.662726	0.275784	-0.999915	⏎
GDT_HA	0.707678	0.671657	-0.998529	0.997985	⏎
GDC_ALL	0.954105	0.684377	-0.983974	0.982605	0.98991	⏎
GDC_SC	0.842715	0.761771	-0.917254	0.91252	0.929965	0.967916	⏎
MP Cablam conf	0.551267	0.489426	-0.440694	0.538061	0.534781	0.555965	0.614485	⏎
MP Cablam ca	0.0748707	-0.0139594	0.0534926	0.0552298	0.0550517	0.0756537	0.133586	0.720588	⏎
Target 3
	LDDT	CAD	RMSD	GDT_TS	GDT_HA	GDC_ALL	GDC_SC	MP Cablam conf
LDDT	⏎
CAD	0.896529	⏎
RMSD	-0.752777	-0.895545	⏎
GDT_TS	-0.244142	-0.188646	-0.999063	⏎
GDT_HA	0.290438	0.43197	-0.999261	0.999066	⏎
GDC_ALL	0.9797	0.887747	-0.945674	0.935156	0.939735	⏎
GDC_SC	0.961423	0.853209	0.010471	0	0	0.310938	⏎
MP Cablam conf	0.723513	0.728176	-0.726858	0.73115	0.72182	0.696833	0.24172	⏎

## Sheet: Comparison-Among-Models
Target_Chain	Model_Chain	Davis_QA
T0201_A	T0201EM007_1_A	0.5
T0201_A	T0201EM001_2_A	0.97
T0201_A	T0201EM001_3_A	0.97
T0201_A	T0201EM013_1_A	0.97
T0201_A	T0201EM015_1_A	0.96
T0201_A	T0201EM012_1_A	0.97
T0201_A	T0201EM009_1_A	0.97
T0201_A	T0201EM008_1_A	0.97
T0201_A	T0201EM003_1_A	0.97
T0201_A	T0201EM003_2_A	0.97
T0201_A	T0201EM003_3_A	0.97
T0202_A	T0202EM004_1_A	0.93
T0202_A	T0202EM004_2_A	0.81
T0202_A	T0202EM006_1_A	0.93
T0202_A	T0202EM007_1_A	0.92
T0202_A	T0202EM001_1_A	0.93
T0202_A	T0202EM001_2_A	0.93
T0202_A	T0202EM001_3_A	0.87
T0202_A	T0202EM013_1_A	0.93
T0202_A	T0202EM010_1_A	0.93
T0202_A	T0202EM011_1_A	0.93
T0202_A	T0202EM012_1_A	0.93
T0202_A	T0202EM005_1_A	0.93
T0202_A	T0202EM009_1_A	0.93
T0202_A	T0202EM008_1_A	0.93
T0202_A	T0202EM002_1_A	0.92
T0202_A	T0202EM002_2_A	0.93
T0202_A	T0202EM003_1_A	0.04
T0202_A	T0202EM003_2_A	0.93
T0202_B	T0202EM004_1_B	0.98
T0202_B	T0202EM004_2_B	0.89
T0202_B	T0202EM006_1_B	0.97
T0202_B	T0202EM007_1_B	0.98
T0202_B	T0202EM001_1_B	0.98
T0202_B	T0202EM001_2_B	0.98
T0202_B	T0202EM001_3_B	0.96
T0202_B	T0202EM013_1_B	0.98
T0202_B	T0202EM010_1_B	0.81
T0202_B	T0202EM011_1_B	0.98
T0202_B	T0202EM012_1_B	0.98
T0202_B	T0202EM005_1_B	0.98
T0202_B	T0202EM009_1_B	0.98
T0202_B	T0202EM008_1_B	0.98
T0202_B	T0202EM002_1_B	0.96
T0202_B	T0202EM002_2_B	0.98
T0202_B	T0202EM003_1_B	0.98
T0202_B	T0202EM003_2_B	0
T0202_C	T0202EM004_1_C	0.98
T0202_C	T0202EM004_2_C	0.93
T0202_C	T0202EM006_1_C	0.98
T0202_C	T0202EM007_1_C	0.98
T0202_C	T0202EM001_1_C	0.98
T0202_C	T0202EM001_2_C	0.98
T0202_C	T0202EM001_3_C	0.82
T0202_C	T0202EM013_1_C	0.98
T0202_C	T0202EM010_1_C	0.99
T0202_C	T0202EM011_1_C	0.96
T0202_C	T0202EM012_1_C	0.98
T0202_C	T0202EM005_1_C	0.98
T0202_C	T0202EM009_1_C	0.98
T0202_C	T0202EM008_1_C	0.98
T0202_C	T0202EM002_1_C	0.98
T0202_C	T0202EM002_2_C	0.98
T0202_C	T0202EM003_1_C	0.98
T0202_C	T0202EM003_2_C	0.98
T0203_A	T0203EM014_1_A	0.93
T0203_A	T0203EM004_1_A	0.93
T0203_A	T0203EM004_2_A	0.84
T0203_A	T0203EM007_1_A	0.93
T0203_A	T0203EM006_1_A	0.93
T0203_A	T0203EM001_1_A	0.84
T0203_A	T0203EM003_1_A	0.69
T0203_A	T0203EM001_2_A	0.93
T0203_A	T0203EM001_3_A	0.93
T0203_A	T0203EM016_1_A	0.93
T0203_A	T0203EM017_1_A	0.93
T0203_A	T0203EM010_1_A	0.93
T0203_A	T0203EM011_1_A	0.93
T0203_A	T0203EM012_1_A	0.93
T0203_A	T0203EM009_1_A	0.93
T0203_A	T0203EM005_1_A	0.93
T0203_A	T0203EM002_1_A	0.93
T0203_A	T0203EM008_1_A	0.93
T0203_A	T0203EM002_2_A	0.93
T0203_A	T0203EM003_2_A	0.69
T0203_A	T0203EM002_3_A	0.26
T0203_C	T0203EM014_1_C	0.98
T0203_C	T0203EM004_1_C	0.98
T0203_C	T0203EM004_2_C	0.89
T0203_C	T0203EM007_1_C	0.98
T0203_C	T0203EM006_1_C	0.73
T0203_C	T0203EM001_1_C	0.98
T0203_C	T0203EM003_1_C	0.98
T0203_C	T0203EM001_2_C	0.98
T0203_C	T0203EM001_3_C	0.98
T0203_C	T0203EM016_1_C	0.98
T0203_C	T0203EM017_1_C	0.98
T0203_C	T0203EM010_1_C	0.92
T0203_C	T0203EM011_1_C	0.98
T0203_C	T0203EM012_1_C	0.98
T0203_C	T0203EM009_1_C	0.98
T0203_C	T0203EM005_1_C	0.98
T0203_C	T0203EM002_1_C	0.98
T0203_C	T0203EM008_1_C	0.98
T0203_C	T0203EM002_2_C	0.98
T0203_C	T0203EM003_2_C	0.98
T0203_C	T0203EM002_3_C	1

## Sheet: Ligand-per-Instance
Model	Ligand	Chain	Residue#	MP Probe Score	MP clash ligand	MOG angl rmsz	MOG bond rmsz	MOG bond out	MOG angle out	MOG tors out	AtomIncl ligand	Q-Ligand	Q-MG	Q-NA	Q-ZN	Q-HOH	Strain MM	Strain NNP
T0201EM001_1	PTQ	A	2001	24.6	0	1.7	2.08	8	5	4	0.3	0.33		-0.08		0.17	2.6	3.9
T0201EM001_2	PTQ	A	2001	32.3	2	1.43	1.29	2	5	4	0.4	0.65	0.64	0.49		0.32	6.3	8.2
T0201EM001_3	PTQ	A	2001	24.8	2	1.6	1.8	4	7	3	0.45	0.62	0.73	0.9		0.34	2.4	4.1
T0201EM002_1	PTQ	A	1101	-1.3	1	2.32	2.33	8	7	4	0.45	0.5				0.63	22.6	13.6
T0201EM002_1	PTQ	B	1101		3	2.36	1.82	7	10	7	0.6	0.56				0.66	4.2	2.4
T0201EM002_1	PTQ	C	1101		0	3.34	2.02	8	12	6	0.6	0.55				0.63	20.6	15.7
T0201EM002_1	PTQ	D	1101		1	2.96	2.24	6	9	7	0.7	0.58				0.63	25.7	13.6
T0201EM002_2	PTQ	A	1101	23.6	1	2.6	2.6	7	9	5	0.75	0.72				0.8	17.1	13.9
T0201EM002_2	PTQ	B	1101		3	3.12	2.2	3	14	4	0.65	0.59				0.84	18.5	13.6
T0201EM002_2	PTQ	C	1101		2	2.31	2.38	7	8	3	0.8	0.79				0.82	5	6.7
T0201EM002_2	PTQ	D	1101		2	1.92	2.33	7	6	4	0.8	0.78				0.8	6	8.3
T0201EM002_3	PTQ	A	1101	9.9	4	3.02	1.95	3	10	1	0.7	0.6				0.33	20.4	13.8
T0201EM002_3	PTQ	B	1101		4	1.79	1.93	2	7	4	0.7	0.64				0.36	19.7	20
T0201EM002_3	PTQ	C	1101		1	1.91	1.95	4	8	2	0.75	0.64				0.33	17.9	10
T0201EM002_3	PTQ	D	1101		2	2.24	2.26	4	8	3	0.85	0.54				0.33	17.3	12.6
T0201EM003_1	PTQ	A	2001	21	0	1.82	2.77	6	4	3	0.38	0.71	0.87	0.87		0.89	8.7	7
T0201EM003_2	PTQ	A	2001	23.1	0	1.9	2.82	6	4	3	0.38	0.71	0.87	0.88		0.88	8.1	10.7
T0201EM003_3	PTQ	A	2001	40.2	0	1.84	1.48	5	6	4	0.35	0.03	0.85	0.66		0.88	3.5	3.6
T0201EM004_1	PTQ	A	2001	-14.4	7	1.67	2.38	4	4	5	0.7	0.71	0.9	0.86			9.2	9.7
T0201EM004_1	PTQ	B	2001		5	1.67	2.39	4	4	5	0.7	0.7	0.89	0.89			9.2	10.2
T0201EM004_1	PTQ	C	2001		32	1.67	2.39	4	4	5	0.7	0.7	0.88	0.88			8.4	8.9
T0201EM004_1	PTQ	D	2001		10	1.67	2.4	4	4	5	0.7	0.71					8.4	9.3
T0201EM004_2	PTQ	A	2001	23.4	0	1.67	2.39	4	4	5	0.38	0.62	0.81	0.69			10	10.7
T0201EM004_2	PTQ	B	2001		0	1.67	2.39	4	4	6	0.38	0.56	0.51	0.86			7.8	7.2
T0201EM004_2	PTQ	C	2001		0	1.67	2.39	4	4	5	0.28	0.16	0.3	0.15			8	8.8
T0201EM004_2	PTQ	D	2001		0	1.67	2.39	5	4	4	0.4	0.48					9.7	8.9
T0201EM005_1	PTQ	A	1101	0.1	4	1.38	1.88	6	2	6	0.8	0.73	0.89	0.87		0.9	9.5	9
T0201EM005_1	PTQ	B	1101		4	1.37	1.88	6	2	6	0.8	0.73	0.89	0.85		0.9	9.4	12
T0201EM005_1	PTQ	C	1101		4	1.31	1.68	5	2	6	0.8	0.72	0.89	0.85		0.9	9.5	10.6
T0201EM005_1	PTQ	D	1101		4	1.37	1.88	6	2	6	0.8	0.73	0.89	0.86		0.9	9.2	9
T0201EM005_2	PTQ	A	1101	21.9	1	1.34	1.33	4	2	5	0.85	0.81	0.89	0.87		0.9	5.6	6.7
T0201EM005_2	PTQ	B	1101		1	1.34	1.33	4	2	5	0.85	0.81	0.89	0.85		0.9	6.2	7.1
T0201EM005_2	PTQ	C	1101		1	1.35	1.28	3	2	6	0.85	0.81	0.89	0.85		0.9	5.9	6.5
T0201EM005_2	PTQ	D	1101		1	1.34	1.34	4	2	5	0.85	0.81	0.89	0.86		0.9	6.2	7.1
T0201EM006_1	PTQ	A	1101	29.3	0	1.13	1.05	0	3	5	0.85	0.79	0.9	0.86		0.85	4.6	4.3
T0201EM006_1	PTQ	B	1101		0	1.14	1.05	0	3	5	0.85	0.79	0.89	0.89		0.85	4.6	2.3
T0201EM006_1	PTQ	C	1101		0	1.14	1.05	0	3	5	0.85	0.79	0.89	0.88		0.85	5.2	2.3
T0201EM006_1	PTQ	D	1101		0	1.14	1.05	0	3	5	0.85	0.78	0.9	0.89		0.85	5.2	4.3
T0201EM007_1	PTQ	A	1101	33.9	0	1.69	2.17	7	4	2	0.23	0.26	0.66	0.6		0.53	5.1	7.1
T0201EM007_1	PTQ	B	2101		2	1.67	1.77	7	4	2	0.2	0.26	0.9	0.81		0.53	3.2	1.1
T0201EM007_1	PTQ	C	3101		0	1.29	1.71	6	1	0	0.21	0.23	0.61	0.51		0.54	3.1	1
T0201EM007_1	PTQ	D	4101		1	1.7	1.5	4	6	3	0.33	0.5	0.47	0.37		0.53	6.2	7.5
T0201EM008_1	PTQ	A	2001	41.2	0	0.73	0.23	0	1	3	0.45						6.1	2.3
T0201EM009_1	PTQ	A	2001	21.7	1	1.27	1.32	2	2	2	0.7	0.78	0.9	0.87		0.92	5.6	4.9
T0201EM009_1	PTQ	B	2001		0	1.27	1.32	2	2	2	0.7	0.78	0.89	0.9		0.92	5.6	4.9
T0201EM009_1	PTQ	C	2001		1	1.27	1.32	2	2	2	0.7	0.79	0.89	0.89		0.91	5.6	4.9
T0201EM009_1	PTQ	D	2001		0	1.27	1.32	2	2	2	0.7	0.78	0.9	0.9		0.92	5.6	6.5
T0201EM010_1	PTQ	A	1101	39.8	1	0.54	0.18	0	0	5	0.8	0.69	0.9			0.92	8.7	9
T0201EM010_1	PTQ	B	1101		0	0.54	0.18	0	0	5	0.75	0.69	0.9			0.93	7.8	7.3
T0201EM010_1	PTQ	C	1101		1	0.54	0.19	0	0	5	0.75	0.69	0.9			0.93	8.1	9
T0201EM010_1	PTQ	D	1101		0	0.54	0.18	0	0	5	0.8	0.7	0.9			0.93	7.8	7.9
T0201EM011_1	PTQ	A	1101	41.3	0	1.81	1.52	2	5	4	0.35	0.63	0.88	0.83			6.4	7.8
T0201EM011_1	PTQ	B	1101		0	1.46	1.16	2	6	6	0.4	0.67	0.89	0.86			7.3	9.8
T0201EM011_1	PTQ	C	1101		0	1.29	1.75	5	2	4	0.42	0.59	0.89	0.88			4.7	6.1
T0201EM011_1	PTQ	D	1101		0	1.23	1.44	3	1	6	0.42	0.66	0.83	0.89			8	7.3
T0201EM012_1	PTQ	A	2001	40.6	0	1.06	0.48	0	2	4	0.85	0.81	0.9	0.91		0.85	7.4	6.1
T0201EM013_1	PTQ	A	2001	2	2	1.58	1.61	2	4	4	0.42	0.63	0.56	0.91		0.48	7.7	8.4
T0201EM014_1	PTQ	A	2001	25.6	0	0.28	0.12	0	0	3	0.4	0.82	0.91	0.89		0.86	4.2	3.8
T0201EM015_1	PTQ	A	2001	43	0	0.75	0.9	1	1	3	0.5	0.76	0.66	0.88		0.8	4.4	4
T0201EM015_1	PTQ	B	2001		0	0.74	0.85	1	0	3	0.45	0.76	0.72	0.91		0.82	4.4	5.8
T0201EM015_1	PTQ	C	2001		0	1.3	0.72	0	3	1	0.42	0.77	0.82	0.9		0.8	8.1	3.6
T0201EM015_1	PTQ	D	2001		0	0.85	0.89	1	1	3	0.42	0.78	0.59	0.9		0.78	4.4	4
T0202EM001_1	POP	A	1003		0	1.67	1.84	1	4	0	0.1	0.48	-0.16		0.75	0.55
T0202EM001_1	F86	P	101	38.4	0	1.3	1.13	1	3	0	0.33	0.61					6.4
T0202EM001_2	POP	A	1005		0	1.34	1.89	1	2	0	0.2	0.03	0.15
T0202EM001_2	F86	P	101	29.3	0	1.27	1.22	1	3	2	0.31	0.59					5.5
T0202EM002_1	F86	A	1001	-13.2	7	2.29	5.86	8	6	2	0.6					0.61
T0202EM002_2	F86	P	101	4.8	3	1.85	5.37	9	7	2	0.44	0.68				0.69	8
T0202EM003_1	F86	A	901	27	1	38.1	131.23	18	19	2	0.29	0.68	0.68		0.84	0.66	4.7
T0202EM003_2	F86	A	1005		1	38.04	131.39	18	19	2	0.29	0.68	0.72		0.83	0.75	4.9
T0202EM004_1	F86	A	1001	-5.1	4	1.61	1.25	3	4	2	0.54	0.74	0.89		0.72		6.7
T0202EM004_1	POP	A	1004		0	1.42	0.85	0	1	2	0.33	0.61	0.89		0.72
T0202EM004_2	F86	A	1006	-106.9	19	1.6	1.25	3	4	2	0.5	0.5	0.66		0.51		6.7
T0202EM004_2	POP	A	1003		1	1.42	0.85	0	1	2	0.09	0.4	0.66		0.51
T0202EM005_1	F86	A	1002	-19.4	4	1.84	3.65	8	4	1	0.5	0.68			0.82	0.84	7
T0202EM005_1	POP	A	1001		1	1.13	0.73	0	1	0	0.33	0.56			0.82	0.84
T0202EM006_1	F86	E	3101	23.5	0	0	0.78	0	0	0	0.54	0.69				0.86	7.3
T0202EM007_1	POP	A	1002		0	2.2	1.63	1	5	0	0.11	0.24	0.12		0.65	0.35
T0202EM007_1	F86	P	101	17.4	1	1.85	1.63	3	6	1	0.42	0.57				0.46	2.8
T0202EM008_1	POP	A	1003		0	0.85	0.8	0	0	0	0.33	0.48	0.89		0.85	0.84
T0202EM008_1	F86	P	102	39.9	0	1.2	0.54	0	2	0	0.33	0.63	0.7				6.8
T0202EM009_1	POP	A	1003		0	1.31	0.75	0	1	1	0.44	0.57			0.8	0.85
T0202EM009_1	F86	P	101	19	0	1.14	0.73	1	3	3	0.54	0.71				0.86	7.2
T0202EM010_1	F86	P	101	14.6	0	1.27	0.63	0	3	3	0.46	0.68					7.9
T0202EM011_1	F86	A	1006	28.1	0	2.16	1.96	5	9	2	0.31	0.56	0.52		0.82		3.5
T0202EM011_1	POP	A	1003		0	2.06	1.18	0	3	0	0.22	0.56	0.52		0.82
T0202EM012_1	POP	A	1003		0	0.85	0.68	0	0	0	0.33	0.56	0.89		0.79	0.85
T0202EM012_1	F86	P	102	22	0	1.25	1.18	2	1	3	0.54	0.68	0.8				7
T0202EM013_1	POP	A	1001		1	1.81	1.04	0	3	1	0	0.01	0.4			0.32
T0202EM013_1	F86	T	101	19.4	0	2.01	1.89	6	8	5	0.34	0.59					8
T0203EM001_1	PEE	A	301	23.9	0	0.9	0.91	1	1	11	0.3	0.61					14
T0203EM001_1	PEE	B	301	18.2	1	0.9	0.91	1	1	11	0.3	0.58					14
T0203EM001_2	PEE	A	301	29.2	0	1.1	0.97	1	2	6	0.33	0.69				0.34	5
T0203EM001_2	PEE	B	301	36.5	0	0.62	1.25	3	0	11	0.2	0.62				0.47	7.9
T0203EM001_3	PEE	B	301	47.5	0	1.21	1.02	2	2	6	0.29	0.63				0.5	17.7
T0203EM001_3	PEE	B	302	26.4	0	1.11	1.39	4	1	8	0.26	0.63				0.5	11.9
T0203EM002_1	PEE	B	301	-79	22	1.16	1.11	2	3	22	0.36	0.71				0.79	27.8
T0203EM002_1	PEE	D	101	-111.6	23	1	1.07	3	2	26	0.47	0.71				0.79
T0203EM002_2	PEE	A	301	8.6	5	1.27	1.13	3	4	23	0.42	0.74				0.78	20.1
T0203EM002_2	PEE	B	301	14.1	4	1.23	1.08	3	3	25	0.44	0.71				0.79	19.1
T0203EM002_3	PEE	B	302	19	3	1.07	1.1	2	3	21	0.33	0.69				0.55	24.3
T0203EM002_3	PEE	B	301	-0.2	5	1.04	1.1	3	3	24	0.44	0.69				0.55	33.8
T0203EM003_1	PEE	A	201	25.9	0	1.27	1.38	1	4	0	0.35	0.73				0.82	15.3
T0203EM003_2	PEE	A	201	31.1	0	1.22	1.39	1	4	0	0.35	0.73				0.84	7.1
T0203EM004_1	PEE	A	301	-1.9	3	1.23	1.35	1	3	13	0.65	0.76					10
T0203EM004_1	PEE	B	301	3.5	1	1.23	1.35	1	3	14	0.7	0.76					8.9
T0203EM004_2	PEE	A	301	52.6	1	0.96	0.92	1	1	14	0.11	0.35					17.7
T0203EM004_2	PEE	B	301	61.1	0	0.96	0.92	1	1	13	0.09	0.17					11.8
T0203EM005_1	PEE	A	301	6	3	1.14	6.2	28	5	37	0.43	0.74				0.84	10.1
T0203EM005_1	PEE	B	301	5.6	3	1.14	6.21	28	5	37	0.43	0.74				0.85	10.1
T0203EM006_1	PEE	A	301	13.8	2	0.89	1.1	2	1	27	0.34	0.7				0.86	19.6
T0203EM006_1	PEE	B	301	13	2	0.89	1.1	2	1	27	0.34	0.71				0.86	19.6
T0203EM007_1	PEE	A	301	7.9	3	0.99	1.03	1	1	11	0.39	0.54				0.48	18.1
T0203EM007_1	PEE	B	301	8.9	3	0.96	1.18	1	2	7	0.39	0.48				0.52	13.7
T0203EM008_1	PEE	A	301	58	0	0.84	0.34	0	3	8	0.11	0.58				0.83	16.3
T0203EM008_1	PEE	B	301	32.1	0	1.09	0.44	0	1	2	0.33	0.69				0.82	16.2
T0203EM009_1	PEE	A	301	33.1	3	0.9	1.28	7	4	21	0.33	0.71				0.86	15.9
T0203EM009_1	PEE	B	301	34.6	3	0.9	1.28	7	4	21	0.33	0.71				0.86	15.9
T0203EM010_1	PEE	A	301	22.6	0	0.54	0.38	0	0	3	0.67	0.73				0.89	12.2
T0203EM010_1	PEE	B	301	18.3	0	0.54	0.38	0	0	3	0.67	0.73				0.88	12.2
T0203EM011_1	PEE	A	301	14.7	0	0.57	0.65	0	0	5	0.3	0.72					16.2
T0203EM011_1	PEE	B	301	22.5	0	0.94	0.6	0	0	5	0.3	0.72					16.9
T0203EM012_1	PEE	A	301	10.6	1	0.8	0.47	0	2	11	0.69	0.75				0.88	6.8
T0203EM014_1	PEE	A	301	35.1	0	0.83	2.07	12	2	19	0.14	0.67				0.86	21.6
T0203EM016_1	PEE	A	301	20.4	0	1.16	1.26	3	2	7	0.74	0.77				0.86	17
T0203EM016_1	PEE	B	301	21.7	0	1.16	1.26	3	2	7	0.74	0.77				0.87	17

## Sheet: Ligand-per-Instance-Correl
All Targets
	MP Probe Score	MP clash ligand	MOG angl rmsz	MOG bond rmsz	MOG bond out	MOG angle out	MOG tors out	AtomIncl ligand	Q-Ligand	Q-HOH	Strain MM
MP Probe Score	⏎
MP clash ligand	-0.907676	⏎
MOG angl rmsz	0.0204863	-0.0152513	⏎
MOG bond rmsz	0.0245292	-0.0159552	0.994522	⏎
MOG bond out	-0.108353	0.0965802	0.443663	0.460974	⏎
MOG angle out	-0.0717873	0.0684675	0.675973	0.619806	0.538274	⏎
MOG tors out	-0.230102	0.273973	-0.103544	-0.0613616	0.399407	-0.0851587	⏎
AtomIncl ligand	-0.226109	0.137214	-0.100751	-0.11039	-0.0339492	0.034951	-0.0880373	⏎
Q-Ligand	-0.161749	0.0967783	0.0064924	0.0343027	0.0220667	-0.084198	0.186393	0.600464	⏎
Q-HOH	-0.0228854	-0.0196234	-0.0637789	-0.027698	-0.0211041	-0.315462	0.130825	0.396217	0.553746	⏎
Strain MM	-0.181041	0.186524	-0.107006	-0.120262	-0.0189367	0.0384982	0.509693	-0.116695	0.0177864	-0.133535	⏎
Target 1
	MP Probe Score	MP clash ligand	MOG angl rmsz	MOG bond rmsz	MOG bond out	MOG angle out	MOG tors out	AtomIncl ligand	Q-Ligand	Q-MG	Q-NA	Q-HOH	Strain MM	Strain NNP
MP Probe Score	⏎
MP clash ligand	-0.753935	⏎
MOG angl rmsz	-0.415626	0.134708	⏎
MOG bond rmsz	-0.525021	0.287713	0.750327	⏎
MOG bond out	-0.410295	0.126495	0.658135	0.792067	⏎
MOG angle out	-0.289935	0.0963854	0.929857	0.594044	0.490691	⏎
MOG tors out	-0.186106	0.158012	0.0634309	0.0654585	0.105005	0.0517765	⏎
AtomIncl ligand	-0.178197	0.191291	-0.0469949	-0.175143	-0.226205	-0.0359733	0.365868	⏎
Q-Ligand	-0.134985	0.0836515	-0.322413	-0.329578	-0.4604	-0.294445	0.164408	0.654202	⏎
Q-MG	-0.0334722	0.121632	-0.216553	-0.240259	-0.134571	-0.266951	0.196268	0.593913	0.49779	⏎
Q-NA	-0.155475	0.107745	-0.343476	-0.274853	-0.416121	-0.372237	0.0935375	0.476224	0.679095	0.693069	⏎
Q-HOH	0.192371	-0.208643	-0.423659	-0.379587	-0.302105	-0.50792	0.296275	0.432794	0.519138	0.736286	0.713137	⏎
Strain MM	-0.495088	0.101517	0.657203	0.375056	0.24935	0.612826	0.160418	0.21383	-0.0456541	0.120433	0.199458	-0.275257	⏎
Strain NNP	-0.525582	0.201164	0.55517	0.451106	0.28156	0.503866	0.292903	0.225007	0.0232276	0.0330423	0.0369952	-0.205203	0.845548	⏎
Target 2
	MP Probe Score	MP clash ligand	MOG angl rmsz	MOG bond rmsz	MOG bond out	MOG angle out	MOG tors out	AtomIncl ligand	Q-Ligand	Q-MG	Q-ZN	Q-HOH	Strain MM
MP Probe Score	⏎
MP clash ligand	-0.970438	⏎
MOG angl rmsz	0.124122	-0.0286038	⏎
MOG bond rmsz	0.12758	-0.0284161	0.999055	⏎
MOG bond out	-0.0867985	0.168396	0.853616	0.856848	⏎
MOG angle out	0.0634536	0.0667101	0.886949	0.878916	0.929299	⏎
MOG tors out	-0.101917	0.149041	0.154805	0.147664	0.34267	0.336027	⏎
AtomIncl ligand	-0.461186	0.352672	-0.117298	-0.0966148	0.135038	-0.0660693	0.341981	⏎
Q-Ligand	0.345092	0.0237916	0.1955	0.208506	0.312548	0.203269	0.347178	0.740219	⏎
Q-MG	-0.00382215	0.126662	0.128704	0.138566	0.137467	-0.0231878	0.458342	0.658544	0.605844	⏎
Q-ZN	0.927456	-0.576112	0.304133	0.310794	0.314483	0.271892	-0.318874	0.15222	0.503076	0.113199	⏎
Q-HOH	-0.0424843	-0.0668512	0.00342018	0.0291261	0.0110815	-0.193167	0.0522722	0.640757	0.750017	0.737056	0.831033	⏎
Strain MM	-0.16429	0.102394	-0.378535	-0.363753	-0.302616	-0.468735	0.254492	0.480037	0.378765	0.708313	-0.528595	0.787865	⏎
Target 3
	MP Probe Score	MP clash ligand	MOG angl rmsz	MOG bond rmsz	MOG bond out	MOG angle out	MOG tors out	AtomIncl ligand	Q-Ligand	Q-HOH	Strain MM
MP Probe Score	⏎
MP clash ligand	-0.909242	⏎
MOG angl rmsz	-0.164054	0.190151	⏎
MOG bond rmsz	-0.100891	0.0493579	0.296549	⏎
MOG bond out	-0.0687045	0.0576912	0.178852	0.967257	⏎
MOG angle out	-0.141978	0.224797	0.642567	0.583207	0.562911	⏎
MOG tors out	-0.381076	0.448361	0.185162	0.624617	0.671797	0.488615	⏎
AtomIncl ligand	-0.347271	0.0701285	0.118633	0.0260519	-0.0234149	0.0963506	-0.0577293	⏎
Q-Ligand	-0.35708	0.123562	0.146414	0.167963	0.182169	0.30695	0.114019	0.611933	⏎
Q-HOH	-0.0855791	0.0612544	-0.127818	0.135177	0.208179	0.227456	0.186082	0.352716	0.623156	⏎
Strain MM	-0.318738	0.496876	0.102182	-0.180027	-0.107066	0.0464637	0.312682	-0.165402	0.0124739	0.0105346	⏎

[truncated: 2 more sheets: Ligand-per-Model, Ligand-per-Model-correl]
